# Supplementary material for: Epidemiology of injuries from fire, heat and hot substances: global, regional and national morbidity and mortality estimates from the Global Burden of Disease 2017 study
Source: PubMed Central journal article supplement (PMC7571358; doi:10.1136/injuryprev-2019-043299), 2019-12-18
Supplement: injuryprev-2019-043299supp003.pdf [file injuryprev-2019-043299supp003.pdf]

| Location                                         | Table 1: Incidence and prevalence for 2017 and percentage change of age-standardised rates between 1990 and 2017 by location for fire, heat, and hot substances |                                         |                                                                   |                                                  |                                         |                                                                   |
|--------------------------------------------------|-----------------------------------------------------------------------------------------------------------------------------------------------------------------|-----------------------------------------|-------------------------------------------------------------------|--------------------------------------------------|-----------------------------------------|-------------------------------------------------------------------|
|                                                  | Incidence (95% UI)                                                                                                                                              |                                         |                                                                   | Prevalence (95% UI)                              |                                         |                                                                   |
|                                                  | 2017 counts                                                                                                                                                     | 2017 age-standardised rates per 100,000 | Percentage change in age-standardised rates between 1990 and 2017 | 2017 counts                                      | 2017 age-standardised rates per 100,000 | Percentage change in age-standardised rates between 1990 and 2017 |
| Global                                           | 8 991 468<br><b>(7 481 218 to 10 740 897)</b>                                                                                                                   | 119<br><b>(99 to 142)</b>               | -5.4<br><b>(-11.1 to 0.3)</b>                                     | 99 746 814<br><b>(85 298 471 to 115 988 070)</b> | 1 247<br><b>(1 065 to 1 452)</b>        | -9.7<br><b>(-11.7 to -7.8)</b>                                    |
| Low SDI                                          | 1 614 670<br><b>(1 317 645 to 1 989 642)</b>                                                                                                                    | 120<br><b>(100 to 144)</b>              | -6.6<br><b>(-13.7 to 0.1)</b>                                     | 12 270 568<br><b>(10 587 721 to 14 153 833)</b>  | 1 213<br><b>(1 049 to 1 398)</b>        | -8.8<br><b>(-11.0 to -6.4)</b>                                    |
| Low-middle SDI                                   | 1 981 535<br><b>(1 635 732 to 2 415 489)</b>                                                                                                                    | 111<br><b>(93 to 134)</b>               | -0.1<br><b>(-6.2 to 6.3)</b>                                      | 17 080 559<br><b>(14 654 098 to 19 754 153)</b>  | 1 126<br><b>(970 to 1 299)</b>          | -6.0<br><b>(-8.3 to -4.0)</b>                                     |
| Middle SDI                                       | 1 806 274<br><b>(1 484 524 to 2 163 891)</b>                                                                                                                    | 89<br><b>(73 to 107)</b>                | 3.7<br><b>(-2.5 to 10.2)</b>                                      | 22 154 701<br><b>(18 718 049 to 25 997 440)</b>  | 974<br><b>(822 to 1 147)</b>            | 2.8<br><b>(-5.8 to 0.2)</b>                                       |
| High-middle SDI                                  | 2 090 241<br><b>(1 761 446 to 2 455 491)</b>                                                                                                                    | 160<br><b>(133 to 190)</b>              | -3.6<br><b>(-9.9 to 2.5)</b>                                      | 24 551 278<br><b>(20 806 660 to 28 686 636)</b>  | 1 467<br><b>(1 241 to 1 722)</b>        | -8.5<br><b>(-11.4 to -5.4)</b>                                    |
| High SDI                                         | 1 471 747<br><b>(1 230 327 to 1 723 680)</b>                                                                                                                    | 153<br><b>(126 to 183)</b>              | -12.0<br><b>(-17.4 to -6.7)</b>                                   | 23 299 055<br><b>(19 856 719 to 27 161 366)</b>  | 1 567<br><b>(1 332 to 1 828)</b>        | -11.4<br><b>(-13.0 to -10.0)</b>                                  |
| Central Europe, Eastern Europe, and Central Asia | 11 32 860<br><b>(970 064 to 1 313 154)</b>                                                                                                                      | 279<br><b>(236 to 331)</b>              | -6.8<br><b>(-12.3 to -1.3)</b>                                    | 11 325 202<br><b>(9 705 049 to 13 148 167)</b>   | 2 184<br><b>(1 857 to 2 526)</b>        | -9.7<br><b>(-12.1 to -7.0)</b>                                    |
| Central Asia                                     | 275 531<br><b>(232 548 to 326 341)</b>                                                                                                                          | 298<br><b>(251 to 353)</b>              | -13.0<br><b>(-20.8 to -5.5)</b>                                   | 2 296 262<br><b>(1 956 542 to 2 656 620)</b>     | 2 581<br><b>(2 203 to 2 981)</b>        | -16.3<br><b>(-19.0 to -13.3)</b>                                  |
| Armenia                                          | 8 775<br><b>(7 326 to 10 427)</b>                                                                                                                               | 308<br><b>(255 to 372)</b>              | -14.8<br><b>(-24.1 to -4.4)</b>                                   | 94 338<br><b>(79 584 to 111 039)</b>             | 2 619<br><b>(2 203 to 3 085)</b>        | -17.4<br><b>(-21.8 to -12.7)</b>                                  |
| Azerbaijan                                       | 36 095<br><b>(31 023 to 42 108)</b>                                                                                                                             | 349<br><b>(297 to 407)</b>              | -12.9<br><b>(-21.0 to -4.9)</b>                                   | 318 895<br><b>(273 157 to 366 653)</b>           | 2 938<br><b>(2 521 to 3 382)</b>        | -20.9<br><b>(-24.9 to -17.2)</b>                                  |
| Georgia                                          | 21 297<br><b>(9 804 to 12 907)</b>                                                                                                                              | 322<br><b>(276 to 376)</b>              | -17.5<br><b>(-24.1 to -10.5)</b>                                  | 120 981<br><b>(103 952 to 138 795)</b>           | 2 622<br><b>(2 246 to 3 027)</b>        | -19.7<br><b>(-23.3 to -16.8)</b>                                  |
| Kazakhstan                                       | 53 228<br><b>(45 070 to 62 711)</b>                                                                                                                             | 298<br><b>(251 to 357)</b>              | -14.7<br><b>(-24.0 to -5.9)</b>                                   | 456 271<br><b>(386 689 to 533 805)</b>           | 2 481<br><b>(2 104 to 2 900)</b>        | -17.1<br><b>(-21.2 to -12.4)</b>                                  |
| Kyrgyzstan                                       | 18 071<br><b>(15 004 to 21 927)</b>                                                                                                                             | 274<br><b>(229 to 330)</b>              | -6.2<br><b>(-15.1 to 2.7)</b>                                     | 141 743<br><b>(120 056 to 164 510)</b>           | 2 457<br><b>(2 091 to 2 847)</b>        | -4.8<br><b>(-9.0 to -0.5)</b>                                     |
| Mongolia                                         | 9 830<br><b>(8 330 to 11 606)</b>                                                                                                                               | 293<br><b>(248 to 349)</b>              | 22.9<br><b>(15.0 to 29.3)</b>                                     | 85 221<br><b>(73 177 to 98 424)</b>              | 2 705<br><b>(2 320 to 3 120)</b>        | 13.6<br><b>(9.9 to 17.3)</b>                                      |
| Tajikistan                                       | 27 576<br><b>(22 977 to 33 240)</b>                                                                                                                             | 285<br><b>(240 to 339)</b>              | -19.6<br><b>(-26.8 to -12.0)</b>                                  | 204 816<br><b>(174 496 to 237 236)</b>           | 2 640<br><b>(2 263 to 3 031)</b>        | -21.8<br><b>(-25.1 to -18.1)</b>                                  |
| Turkmenistan                                     | 15 523<br><b>(13 122 to 18 369)</b>                                                                                                                             | 304<br><b>(257 to 363)</b>              | -25.9<br><b>(-33.1 to -18.0)</b>                                  | 129 351<br><b>(110 038 to 150 863)</b>           | 2 690<br><b>(2 293 to 3 125)</b>        | -31.9<br><b>(-34.8 to -28.6)</b>                                  |
| Uzbekistan                                       | 95 136<br><b>(79 413 to 113 872)</b>                                                                                                                            | 284<br><b>(238 to 340)</b>              | -6.2<br><b>(-15.3 to 2.4)</b>                                     | 744 634<br><b>(632 698 to 864 656)</b>           | 2 464<br><b>(2 100 to 2 849)</b>        | -11.3<br><b>(-15.4 to -7.3)</b>                                   |
| Central Europe                                   | 220 207<br><b>(187 759 to 253 843)</b>                                                                                                                          | 208<br><b>(172 to 248)</b>              | -1.8<br><b>(-7.9 to 4.0)</b>                                      | 2 434 812<br><b>(2 064 530 to 2 841 238)</b>     | 1 599<br><b>(1 337 to 1 899)</b>        | -8.1<br><b>(-10.5 to -5.8)</b>                                    |
| Albania                                          | 5 171<br><b>(4 297 to 6 063)</b>                                                                                                                                | 198<br><b>(163 to 236)</b>              | -18.1<br><b>(-20.8 to -15.4)</b>                                  | 52 155<br><b>(43 765 to 61 133)</b>              | 1 546<br><b>(1 285 to 1 841)</b>        | -2.7<br><b>(-2.3 to 6.6)</b>                                      |
| Bosnia and Herzegovina                           | 6 373<br><b>(5 314 to 7 432)</b>                                                                                                                                | 205<br><b>(168 to 249)</b>              | -14.5<br><b>(-7.4 to 21.6)</b>                                    | 72 307<br><b>(61 517 to 84 647)</b>              | 1 619<br><b>(1 357 to 1 925)</b>        | -1.6<br><b>(-1.6 to 5.5)</b>                                      |
| Bulgaria                                         | 12 645<br><b>(10 617 to 14 618)</b>                                                                                                                             | 198<br><b>(163 to 236)</b>              | -2.9<br><b>(-11.3 to 5.2)</b>                                     | 150 059<br><b>(127 733 to 175 238)</b>           | 1 532<br><b>(1 285 to 1 817)</b>        | -9.3<br><b>(-14.6 to -4.9)</b>                                    |
| Croatia                                          | 5 481<br><b>(4 799 to 6 230)</b>                                                                                                                                | 135<br><b>(117 to 158)</b>              | -18.3<br><b>(-25.0 to -11.4)</b>                                  | 58 814<br><b>(50 210 to 68 443)</b>              | 1 004<br><b>(852 to 1 178)</b>          | -20.6<br><b>(-24.6 to -17.7)</b>                                  |
| Czech Republic                                   | 23 596<br><b>(20 028 to 27 234)</b>                                                                                                                             | 250<br><b>(208 to 298)</b>              | 13.6<br><b>(16.1 to 31.7)</b>                                     | 271 979<br><b>(231 065 to 319 835)</b>           | 1 948<br><b>(1 634 to 2 337)</b>        | 22.3<br><b>(18.1 to 28.7)</b>                                     |
| Hungary                                          | 17 666<br><b>(14 832 to 20 657)</b>                                                                                                                             | 203<br><b>(168 to 248)</b>              | -5.5<br><b>(-14.7 to 2.6)</b>                                     | 205 569<br><b>(173 953 to 239 758)</b>           | 1 574<br><b>(1 313 to 1 869)</b>        | -5.8<br><b>(-9.4 to -2.0)</b>                                     |
| Macedonia                                        | 3 993<br><b>(3 311 to 4 685)</b>                                                                                                                                | 197<br><b>(162 to 239)</b>              | 21.4<br><b>(14.4 to 29.1)</b>                                     | 42 337<br><b>(35 745 to 49 527)</b>              | 1 543<br><b>(1 289 to 1 828)</b>        | 8.2<br><b>(2.9 to 11.9)</b>                                       |
| Montenegro                                       | 1 196<br><b>(1 007 to 1 400)</b>                                                                                                                                | 203<br><b>(167 to 246)</b>              | 5.0<br><b>(-2.0 to 13.6)</b>                                      | 12 308<br><b>(10 324 to 14 398)</b>              | 1 576<br><b>(1 312 to 1 860)</b>        | 1.4<br><b>(-2.5 to 6.3)</b>                                       |
| Poland                                           | 75 772<br><b>(64 684 to 87 828)</b>                                                                                                                             | 211<br><b>(175 to 254)</b>              | -3.1<br><b>(-4.1 to 10.9)</b>                                     | 822 569<br><b>(693 934 to 962 791)</b>           | 1 621<br><b>(1 352 to 1 924)</b>        | 4.0<br><b>(-7.8 to 10.5)</b>                                      |
| Romania                                          | 37 774<br><b>(32 424 to 43 592)</b>                                                                                                                             | 205<br><b>(171 to 242)</b>              | -25.2<br><b>(-32.6 to -17.6)</b>                                  | 410 483<br><b>(348 027 to 476 278)</b>           | 1 568<br><b>(1 313 to 1 850)</b>        | -32.1<br><b>(-35.5 to -28.7)</b>                                  |
| Serbia                                           | 16 313<br><b>(13 616 to 19 137)</b>                                                                                                                             | 200<br><b>(165 to 241)</b>              | 8.8<br><b>(0.3 to 18.1)</b>                                       | 177 902<br><b>(149 642 to 207 283)</b>           | 1 557<br><b>(1 294 to 1 844)</b>        | 1.7<br><b>(-2.1 to 5.8)</b>                                       |
| Slovakia                                         | 9 999<br><b>(8 559 to 11 700)</b>                                                                                                                               | 201<br><b>(165 to 241)</b>              | 7.3<br><b>(0.6 to 14.5)</b>                                       | 109 359<br><b>(92 337 to 128 132)</b>            | 1 560<br><b>(1 306 to 1 852)</b>        | 4.7<br><b>(1.6 to 9.4)</b>                                        |
| Slovenia                                         | 4 227<br><b>(3 575 to 4 817)</b>                                                                                                                                | 225<br><b>(190 to 265)</b>              | 19.5<br><b>(11.8 to 27.5)</b>                                     | 45 571<br><b>(41 272 to 57 013)</b>              | 1 727<br><b>(1 440 to 2 072)</b>        | 18.8<br><b>(14.0 to 23.7)</b>                                     |
| Eastern Europe                                   | 637 123<br><b>(543 015 to 738 624)</b>                                                                                                                          | 303<br><b>(256 to 359)</b>              | -8.0<br><b>(-13.4 to -2.5)</b>                                    | 6 594 128<br><b>(5 615 482 to 7 709 342)</b>     | 2 346<br><b>(2 006 to 2 743)</b>        | -10.2<br><b>(-13.2 to -7.1)</b>                                   |
| Belarus                                          | 33 658<br><b>(29 315 to 38 363)</b>                                                                                                                             | 346<br><b>(299 to 402)</b>              | -4.3<br><b>(-11.6 to 4.1)</b>                                     | 330 068<br><b>(280 806 to 382 585)</b>           | 2 556<br><b>(2 189 to 2 970)</b>        | -9.4<br><b>(-14.0 to -5.6)</b>                                    |
| Estonia                                          | 4 192<br><b>(3 636 to 4 824)</b>                                                                                                                                | 327<br><b>(278 to 385)</b>              | -33.7<br><b>(-40.2 to -26.5)</b>                                  | 45 353<br><b>(38 626 to 52 681)</b>              | 2 480<br><b>(2 113 to 2 889)</b>        | -32.4<br><b>(-36.0 to -28.3)</b>                                  |
| Latvia                                           | 6 532<br><b>(5 653 to 7 497)</b>                                                                                                                                | 338<br><b>(290 to 397)</b>              | -27.0<br><b>(-33.7 to -19.2)</b>                                  | 70 472<br><b>(60 417 to 82 268)</b>              | 2 531<br><b>(2 167 to 2 949)</b>        | -27.7<br><b>(-31.7 to -23.7)</b>                                  |
| Lithuania                                        | 8 071<br><b>(6 931 to 9 283)</b>                                                                                                                                | 305<br><b>(258 to 363)</b>              | -5.5<br><b>(-14.3 to 4.4)</b>                                     | 94 576<br><b>(80 799 to 110 234)</b>             | 2 392<br><b>(2 031 to 2 802)</b>        | -3.3<br><b>(-7.5 to 1.2)</b>                                      |
| Moldova                                          | 10 236<br><b>(8 797 to 11 944)</b>                                                                                                                              | 280<br><b>(237 to 344)</b>              | -10.0<br><b>(-18.5 to -1.7)</b>                                   | 110 185<br><b>(94 307 to 127 755)</b>            | 2 293<br><b>(1 953 to 2 656)</b>        | -11.6<br><b>(-16.1 to -6.7)</b>                                   |
| Russian Federation                               | 437 326<br><b>(371 489 to 508 232)</b>                                                                                                                          | 299<br><b>(252 to 355)</b>              | -8.8<br><b>(-14.4 to -3.2)</b>                                    | 4 482 636<br><b>(3 814 918 to 5 250 886)</b>     | 2 318<br><b>(1 973 to 2 715)</b>        | -11.0<br><b>(-13.9 to -8.1)</b>                                   |
| Ukraine                                          | 137 108<br><b>(116 205 to 159 814)</b>                                                                                                                          | 305<br><b>(261 to 366)</b>              | -2.9<br><b>(-8.9 to 4.3)</b>                                      | 1 460 839<br><b>(1 236 321 to 1 705 616)</b>     | 2 382<br><b>(2 022 to 2 782)</b>        | -5.5<br><b>(-8.8 to 0.0)</b>                                      |
| High-income                                      | 1 351 422<br><b>(1 133 053 to 1 588 240)</b>                                                                                                                    | 151<br><b>(125 to 182)</b>              | -13.4<br><b>(-18.6 to -8.1)</b>                                   | 21 070 756<br><b>(17 986 161 to 24 493 202)</b>  | 1 528<br><b>(1 298 to 1 785)</b>        | -14.4<br><b>(-16.2 to -12.8)</b>                                  |
| Australasia                                      | 52 135<br><b>(43 400 to 61 911)</b>                                                                                                                             | 219<br><b>(180 to 267)</b>              | 5.3<br><b>(-0.7 to 11.8)</b>                                      | 585 729<br><b>(495 935 to 704 719)</b>           | 1 749<br><b>(1 475 to 2 163)</b>        | 5.7<br><b>(2.4 to 9.4)</b>                                        |
| Australia                                        | 41 299<br><b>(34 279 to 49 650)</b>                                                                                                                             | 205<br><b>(167 to 255)</b>              | 6.5<br><b>(-0.7 to 14.5)</b>                                      | 470 835<br><b>(396 677 to 564 393)</b>           | 1 659<br><b>(1 388 to 2 034)</b>        | 7.8<br><b>(4.3 to 12.3)</b>                                       |
| New Zealand                                      | 10 836<br><b>(9 233 to 12 653)</b>                                                                                                                              | 292<br><b>(245 to 348)</b>              | 3.5<br><b>(-4.5 to 11.3)</b>                                      | 114 894<br><b>(97 702 to 141 215)</b>            | 2 231<br><b>(1 884 to 2 785)</b>        | 0.1<br><b>(-6.2 to 7.3)</b>                                       |
| High-income Asia-Pacific                         | 282 319<br><b>(234 187 to 329 399)</b>                                                                                                                          | 200<br><b>(164 to 241)</b>              | 10.9<br><b>(4.0 to 17.9)</b>                                      | 5 867 339<br><b>(4 998 817 to 6 851 226)</b>     | 2 257<br><b>(1 918 to 2 658)</b>        | 11.2<br><b>(9.1 to 13.7)</b>                                      |
| Brunei                                           | 855<br><b>(720 to 1 008)</b>                                                                                                                                    | 200<br><b>(168 to 238)</b>              | -11.8<br><b>(-19.8 to -3.5)</b>                                   | 7 313<br><b>(6 196 to 8 531)</b>                 | 1 652<br><b>(1 403 to 1 924)</b>        | -16.6<br><b>(-20.2 to -12.7)</b>                                  |
| Japan                                            | 193 311<br><b>(162 386 to 227 205)</b>                                                                                                                          | 209<br><b>(171 to 253)</b>              | 23.4<br><b>(17.9 to 29.5)</b>                                     | 4 726 517<br><b>(4 029 268 to 5 512 003)</b>     | 2 605<br><b>(2 207 to 3 082)</b>        | 24.9<br><b>(23.1 to 27.0)</b>                                     |
| South Korea                                      | 76 311<br><b>(62 788 to 90 620)</b>                                                                                                                             | 180<br><b>(148 to 218)</b>              | -12.8<br><b>(-22.2 to -2.9)</b>                                   | 1 021 988<br><b>(871 751 to 1 192 249)</b>       | 1 512<br><b>(1 288 to 1 784)</b>        | -18.3<br><b>(-22.2 to -13.3)</b>                                  |
| Singapore                                        | 9 842<br><b>(8 057 to 11 687)</b>                                                                                                                               | 200<br><b>(164 to 242)</b>              | 24.9<br><b>(18.9 to 31.8)</b>                                     | 111 521<br><b>(94 118 to 130 630)</b>            | 1 689<br><b>(1 428 to 1 998)</b>        | 20.6<br><b>(17.2 to 24.6)</b>                                     |
| High-income North America                        | 433 643<br><b>(361 989 to 506 449)</b>                                                                                                                          | 132<br><b>(110 to 157)</b>              | -38.1<br><b>(-42.3 to -33.9)</b>                                  | 7 193 870<br><b>(6 126 490 to 8 428 848)</b>     | 1 580<br><b>(1 339 to 1 852)</b>        | -38.8<br><b>(-41.3 to -37.1)</b>                                  |
| Canada                                           | 53 291<br><b>(44 057 to 62 693)</b>                                                                                                                             | 171<br><b>(141 to 204)</b>              | -13.2<br><b>(-21.1 to -4.6)</b>                                   | 665 904<br><b>(570 829 to 784 262)</b>           | 1 437<br><b>(1 219 to 1 685)</b>        | -11.1<br><b>(-14.8 to -7.4)</b>                                   |
| Greenland                                        | 102<br><b>(88 to 117)</b>                                                                                                                                       | 191<br><b>(163 to 220)</b>              | -48.6<br><b>(-53.6 to -43.5)</b>                                  | 1 040<br><b>(888 to 1 207)</b>                   | 1 606<br><b>(1 373 to 1 870)</b>        | -51.4<br><b>(-53.7 to -48.7)</b>                                  |
| USA                                              | 380 242<br><b>(317 912 to 444 301)</b>                                                                                                                          | 128<br><b>(107 to 152)</b>              | -40.4<br><b>(-44.4 to -36.4)</b>                                  | 6 523 200<br><b>(5 553 925 to 7 652 530)</b>     | 1 597<br><b>(1 354 to 1 874)</b>        | -40.6<br><b>(-43.0 to -38.9)</b>                                  |
| Southern Latin America                           | 133 683<br><b>(111 828 to 158 052)</b>                                                                                                                          | 226<br><b>(187 to 272)</b>              | 14.7<br><b>(5.0 to 25.2)</b>                                      | 1 308 219<br><b>(1 110 035 to 1 604 142)</b>     | 1 854<br><b>(1 570 to 2 340)</b>        | 2.9<br><b>(-1.4 to 8.2)</b>                                       |
| Argentina                                        | 90 451<br><b>(74 393 to 108 975)</b>                                                                                                                            | 171<br><b>(181 to 272)</b>              | -27.7<br><b>(10.6 to 33.6)</b>                                    | 665 904<br><b>(737 608 to 1 086 964)</b>         | 1 863<br><b>(1 574 to 2 338)</b>        | 10.7<br><b>(6.1 to 15.9)</b>                                      |
| Chile                                            | 36 946<br><b>(31 899 to 42 260)</b>                                                                                                                             | 243<br><b>(206 to 284)</b>              | 1.0<br><b>(-8.4 to 12.5)</b>                                      | 367 650<br><b>(310 160 to 467 425)</b>           | 1 861<br><b>(1 563 to 2 394)</b>        | -13.3<br><b>(-19.2 to -6.8)</b>                                   |

| Location                           | Incidence (95% UI)                      |                                         |                                                                   | Prevalence (95% UI)                           |                                         |                                                                   |
|------------------------------------|-----------------------------------------|-----------------------------------------|-------------------------------------------------------------------|-----------------------------------------------|-----------------------------------------|-------------------------------------------------------------------|
|                                    | 2017 counts                             | 2017 age-standardised rates per 100,000 | Percentage change in age-standardised rates between 1990 and 2017 | 2017 counts                                   | 2017 age-standardised rates per 100,000 | Percentage change in age-standardised rates between 1990 and 2017 |
| Uruguay                            | 6 281<br>(5 184 to 7 530)               | 213<br>(173 to 262)                     | 15.7<br>(5.2 to 27.9)                                             | 67 332<br>(56 536 to 83 028)                  | 1 741<br>(1 457 to 2 172)               | 4.5<br>(0.0 to 8.6)                                               |
| <b>Western Europe</b>              | <b>449 641<br/>(373 154 to 531 728)</b> | <b>130<br/>(106 to 156)</b>             | <b>-3.2<br/>(-8.3 to 3.1)</b>                                     | <b>6 115 599<br/>(5 229 409 to 7 082 058)</b> | <b>1 099<br/>(933 to 1 298)</b>         | <b>-2.3<br/>(-4.1 to -0.5)</b>                                    |
| Andorra                            | 86<br>(70 to 103)                       | 135<br>(110 to 166)                     | -7.5<br>(-14.5 to -0.5)                                           | 1 173<br>(999 to 1 373)                       | 1 128<br>(957 to 1 336)                 | -6.2<br>(-11.2 to -2.3)                                           |
| Austria                            | 9 437<br>(7 736 to 11 285)              | 135<br>(109 to 165)                     | 9.8<br>(4.2 to 16.4)                                              | 127 304<br>(108 290 to 148 281)               | 1 121<br>(957 to 1 336)                 | 9.9<br>(5.9 to 14.1)                                              |
| Belgium                            | 12 286<br>(10 664 to 14 156)            | 125<br>(110 to 153)                     | -10.9<br>(-16.6 to -3.7)                                          | 150 566<br>(130 254 to 175 417)               | 1 043<br>(897 to 1 219)                 | -11.6<br>(-15.3 to -8.0)                                          |
| Cyprus                             | 1 424<br>(1 167 to 1 697)               | 131<br>(107 to 162)                     | 5.7<br>(-1.1 to 11.9)                                             | 16 742<br>(14 295 to 19 545)                  | 1 094<br>(934 to 1 291)                 | 2.1<br>(-1.3 to 6.0)                                              |
| Denmark                            | 6 440<br>(5 336 to 7 618)               | 138<br>(112 to 167)                     | 6.8<br>(-0.1 to 13.7)                                             | 82 713<br>(70 270 to 96 333)                  | 1 144<br>(971 to 1 356)                 | 7.8<br>(2.8 to 11.8)                                              |
| Finland                            | 7 094<br>(6 010 to 8 252)               | 159<br>(132 to 191)                     | -10.9<br>(-17.2 to -4.2)                                          | 92 739<br>(79 016 to 108 182)                 | 1 300<br>(1 096 to 1 545)               | -8.7<br>(-11.9 to -5.1)                                           |
| France                             | 76 032<br>(62 927 to 90 421)            | 141<br>(115 to 172)                     | -4.5<br>(-11.4 to 3.4)                                            | 965 878<br>(823 880 to 1 25 637)              | 1 172<br>(998 to 1 379)                 | -2.3<br>(-5.8 to 1.6)                                             |
| Germany                            | 85 467<br>(70 979 to 100 827)           | 134<br>(109 to 164)                     | -2.6<br>(-9.9 to 5.4)                                             | 1 117<br>(1 052 566 to 1 440 324)             | 1 117<br>(955 to 1 326)                 | -1.5<br>(-5.7 to 2.5)                                             |
| Greece                             | 9 603<br>(7 824 to 11 395)              | 120<br>(97 to 147)                      | -0.0<br>(-6.6 to 7.4)                                             | 138 377<br>(118 413 to 161 554)               | 997<br>(845 to 1 179)                   | 0.3<br>(-3.0 to 3.6)                                              |
| Iceland                            | 393<br>(319 to 473)                     | 133<br>(108 to 164)                     | 0.4<br>(-6.3 to 7.4)                                              | 4 417<br>(3 782 to 5 153)                     | 1 111<br>(948 to 1 322)                 | 1.6<br>(-2.7 to 5.6)                                              |
| Ireland                            | 5 724<br>(4 649 to 6 890)               | 133<br>(108 to 163)                     | -12.8<br>(-20.6 to -5.0)                                          | 63 581<br>(54 041 to 74 085)                  | 1 114<br>(944 to 1 319)                 | -11.1<br>(-14.8 to -7.5)                                          |
| Israel                             | 11 182<br>(9 100 to 13 711)             | 129<br>(105 to 158)                     | -4.8<br>(-11.4 to 1.9)                                            | 100 784<br>(85 697 to 119 787)                | 1 074<br>(912 to 1 289)                 | -6.5<br>(-9.8 to -3.2)                                            |
| Italy                              | 47 325<br>(39 091 to 56 461)            | 101<br>(83 to 124)                      | -9.7<br>(-16.9 to -0.4)                                           | 682 626<br>(585 168 to 788 371)               | 830<br>(710 to 985)                     | -9.8<br>(-12.1 to -6.9)                                           |
| Luxembourg                         | 588<br>(561 to 823)                     | 138<br>(112 to 167)                     | 8.7<br>(2.3 to 16.5)                                              | 1 147<br>(7 097 to 9 724)                     | 1 147<br>(971 to 1 366)                 | 10.0<br>(4.5 to 13.3)                                             |
| Malta                              | 588<br>(489 to 692)                     | 169<br>(139 to 203)                     | -26.1<br>(19.3 to 33.5)                                           | 7 947<br>(6 823 to 9 280)                     | 1 404<br>(1 201 to 1 660)               | 25.9<br>(22.9 to 29.6)                                            |
| Netherlands                        | 11 517<br>(9 653 to 13 727)             | 84<br>(69 to 102)                       | -16.9<br>(-23.9 to -9.2)                                          | 149 879<br>(127 681 to 174 628)               | 695<br>(589 to 832)                     | -17.1<br>(-21.6 to -13.0)                                         |
| Norway                             | 6 675<br>(5 518 to 7 915)               | 150<br>(122 to 182)                     | -13.4<br>(-19.2 to -6.8)                                          | 118 008<br>(100 173 to 137 937)               | 1 805<br>(1 528 to 2 134)               | -11.3<br>(-14.0 to -8.8)                                          |
| Portugal                           | 10 331<br>(8 531 to 12 231)             | 127<br>(103 to 155)                     | -13.1<br>(-20.8 to -4.2)                                          | 151 404<br>(130 405 to 175 926)               | 1 063<br>(909 to 1 260)                 | -15.2<br>(-19.0 to -11.5)                                         |
| Spain                              | 49 995<br>(40 604 to 59 747)            | 136<br>(110 to 168)                     | 0.9<br>(-7.1 to 10.1)                                             | 693 524<br>(594 583 to 800 875)               | 1 139<br>(971 to 1 347)                 | 2.3<br>(-1.1 to 5.8)                                              |
| Sweden                             | 12 266<br>(10 124 to 14 583)            | 148<br>(120 to 180)                     | 2.1<br>(-3.6 to 7.6)                                              | 234 501<br>(197 786 to 273 854)               | 1 832<br>(1 542 to 2 160)               | 3.3<br>(-0.2 to 6.8)                                              |
| Switzerland                        | 9 113<br>(7 833 to 10 526)              | 136<br>(114 to 159)                     | 17.9<br>(9.2 to 28.3)                                             | 118 607<br>(101 160 to 138 958)               | 1 098<br>(937 to 1 315)                 | 14.8<br>(9.3 to 20.7)                                             |
| United Kingdom                     | 75 509<br>(62 051 to 89 694)            | 137<br>(111 to 168)                     | -0.5<br>(-6.8 to 5.7)                                             | 966 800<br>(823 728 to 1 129 218)             | 1 171<br>(991 to 1 384)                 | 0.9<br>(-1.7 to 3.3)                                              |
| <b>Latin America and Caribbean</b> | <b>499 432<br/>(412 826 to 598 881)</b> | <b>89<br/>(73 to 108)</b>               | <b>-19.4<br/>(-24.3 to -14.3)</b>                                 | <b>5 470 429<br/>(4 620 037 to 6 606 896)</b> | <b>920<br/>(778 to 1 111)</b>           | <b>-28.5<br/>(-30.1 to -26.7)</b>                                 |
| <b>Andean Latin America</b>        | <b>66 869<br/>(54 431 to 81 190)</b>    | <b>107<br/>(88 to 130)</b>              | <b>-3.3<br/>(-13.0 to 6.8)</b>                                    | <b>558 745<br/>(468 384 to 665 076)</b>       | <b>944<br/>(794 to 1 121)</b>           | <b>-13.9<br/>(-17.5 to -9.8)</b>                                  |
| Bolivia                            | 11 883<br>(9 687 to 14 487)             | 100<br>(82 to 121)                      | -14.1<br>(-24.0 to -2.5)                                          | 98 166<br>(83 665 to 115 771)                 | 934<br>(801 to 1 098)                   | -20.9<br>(-24.4 to -16.5)                                         |
| Ecuador                            | 18 389<br>(15 039 to 22 307)            | 110<br>(90 to 133)                      | -6.3<br>(-16.3 to 4.2)                                            | 155 017<br>(130 960 to 184 471)               | 954<br>(808 to 1 130)                   | -16.7<br>(-20.9 to -12.3)                                         |
| Peru                               | 36 597<br>(29 654 to 44 593)            | 109<br>(89 to 133)                      | 2.4<br>(-8.1 to 13.3)                                             | 305 562<br>(254 016 to 366 265)               | 942<br>(784 to 1 128)                   | -10.4<br>(-15.1 to -5.6)                                          |
| <b>Caribbean</b>                   | <b>57 212<br/>(46 775 to 69 028)</b>    | <b>130<br/>(106 to 159)</b>             | <b>2.4<br/>(-5.4 to 10.8)</b>                                     | <b>582 228<br/>(493 275 to 699 698)</b>       | <b>1 198<br/>(1 015 to 1 442)</b>       | <b>1.2<br/>(-2.0 to 4.3)</b>                                      |
| Antigua and Barbuda                | 111<br>(92 to 131)                      | 140<br>(115 to 168)                     | 17.4<br>(-26.8 to -8.9)                                           | 1 144<br>(954 to 1 377)                       | 1 160<br>(968 to 1 407)                 | -21.7<br>(-25.4 to -17.5)                                         |
| The Bahamas                        | 481<br>(406 to 566)                     | 139<br>(115 to 167)                     | -22.7<br>(-31.1 to -14.3)                                         | 4 694<br>(3 973 to 5 605)                     | 1 169<br>(989 to 1 397)                 | -25.1<br>(-28.5 to -21.9)                                         |
| Barbados                           | 337<br>(278 to 401)                     | 140<br>(112 to 171)                     | 10.3<br>(-0.8 to 22.0)                                            | 4 137<br>(3 465 to 5 029)                     | 1 163<br>(967 to 1 438)                 | 4.9<br>(-6.3 to 11.1)                                             |
| Belize                             | 519<br>(421 to 640)                     | 127<br>(104 to 155)                     | 7.1<br>(-3.2 to 18.7)                                             | 4 272<br>(3 594 to 5 178)                     | 1 167<br>(993 to 1 400)                 | 3.2<br>(-0.4 to 7.5)                                              |
| Bermuda                            | 83<br>(68 to 99)                        | 166<br>(133 to 206)                     | 49.8<br>(40.4 to 60.4)                                            | 1 131<br>(951 to 1 352)                       | 1 351<br>(1 128 to 1 678)               | 37.4<br>(30.8 to 47.3)                                            |
| Cuba                               | 14 254<br>(11 715 to 17 176)            | 156<br>(126 to 195)                     | -21.7<br>(-9.4 to 35.9)                                           | 175 934<br>(147 332 to 209 975)               | 1 270<br>(1 056 to 1 546)               | 14.3<br>(7.8 to 21.9)                                             |
| Dominica                           | 82<br>(68 to 97)                        | 134<br>(110 to 161)                     | 5.6<br>(-3.7 to 15.0)                                             | 897<br>(759 to 1 070)                         | 1 171<br>(988 to 1 414)                 | 1.0<br>(-4.3 to 6.1)                                              |
| Dominican Republic                 | 13 422<br>(11 004 to 16 199)            | 130<br>(106 to 157)                     | 14.3<br>(4.7 to 24.4)                                             | 118 348<br>(99 621 to 141 905)                | 1 144<br>(965 to 1 367)                 | -1.1<br>(-5.1 to 3.5)                                             |
| Grenada                            | 136<br>(113 to 164)                     | 135<br>(111 to 165)                     | 16.1<br>(-25.3 to 6.4)                                            | 1 476<br>(1 247 to 1 772)                     | 1 214<br>(1 023 to 1 465)               | -18.9<br>(-22.7 to -13.6)                                         |
| Guyana                             | 908<br>(747 to 1 101)                   | 122<br>(101 to 148)                     | -4.2<br>(-14.3 to 6.2)                                            | 8 289<br>(7 093 to 9 864)                     | 1 143<br>(979 to 1 355)                 | -8.3<br>(-11.5 to -4.5)                                           |
| Haiti                              | 14 211<br>(11 398 to 17 418)            | 111<br>(91 to 135)                      | -23.8<br>(-31.3 to -15.7)                                         | 120 754<br>(103 031 to 144 631)               | 1 136<br>(975 to 1 346)                 | -26.7<br>(-29.4 to -24.2)                                         |
| Jamaica                            | 3 544<br>(2 878 to 4 299)               | 139<br>(112 to 171)                     | 31.8<br>(23.2 to 42.7)                                            | 3 913<br>(3 017 to 43 434)                    | 1 233<br>(1 031 to 1 489)               | 23.0<br>(18.5 to 29.7)                                            |
| Puerto Rico                        | 4 353<br>(3 606 to 5 228)               | 150<br>(122 to 186)                     | -33.3<br>(-23.7 to 44.1)                                          | 55 066<br>(45 890 to 67 160)                  | 1 221<br>(1 005 to 1 527)               | 29.0<br>(24.7 to 36.1)                                            |
| Saint Lucia                        | 210<br>(173 to 253)                     | 135<br>(109 to 165)                     | 10.2<br>(-20.5 to 1.3)                                            | 2 301<br>(1 944 to 2 771)                     | 1 178<br>(993 to 1 433)                 | -14.0<br>(-17.8 to -9.5)                                          |
| Saint Vincent and the Grenadines   | 135<br>(111 to 162)                     | 129<br>(105 to 157)                     | -3.2<br>(-13.8 to 6.6)                                            | 1 441<br>(1 217 to 1 726)                     | 1 165<br>(983 to 1 401)                 | -5.1<br>(-9.1 to 0.4)                                             |
| Suriname                           | 691<br>(572 to 834)                     | 125<br>(103 to 153)                     | -10.0<br>(-19.5 to 0.5)                                           | 6 836<br>(5 819 to 8 116)                     | 1 149<br>(977 to 1 370)                 | -14.3<br>(-18.2 to -10.8)                                         |
| Trinidad and Tobago                | 1 545<br>(1 280 to 1 844)               | 125<br>(101 to 153)                     | 3.7<br>(-5.7 to 14.5)                                             | 17 115<br>(14 416 to 20 357)                  | 1 086<br>(914 to 1 300)                 | -1.5<br>(-4.9 to 2.0)                                             |
| Virgin Islands                     | 131<br>(108 to 157)                     | 149<br>(121 to 184)                     | 18.8<br>(8.6 to 29.7)                                             | 1 543<br>(1 292 to 1 846)                     | 1 214<br>(1 010 to 1 485)               | 9.3<br>(3.8 to 16.0)                                              |
| <b>Central Latin America</b>       | <b>230 986<br/>(187 010 to 283 511)</b> | <b>93<br/>(75 to 114)</b>               | <b>-17.6<br/>(-23.8 to -11.2)</b>                                 | <b>2 356 860<br/>(1 962 758 to 3 004 398)</b> | <b>930<br/>(776 to 1 183)</b>           | <b>-28.3<br/>(-30.6 to -24.9)</b>                                 |
| Colombia                           | 46 283<br>(36 498 to 57 458)            | 98<br>(76 to 124)                       | -19.7<br>(-31.4 to -7.7)                                          | 420 433<br>(350 894 to 540 244)               | 805<br>(670 to 1 037)                   | -29.6<br>(-34.6 to -24.5)                                         |
| Costa Rica                         | 4 433<br>(3 518 to 5 550)               | 107<br>(84 to 136)                      | -10.2<br>(-5.4 to 24.9)                                           | 41 344<br>(34 415 to 54 694)                  | 846<br>(705 to 1 127)                   | 3.6<br>(-0.4 to 8.9)                                              |
| El Salvador                        | 5 291<br>(4 148 to 6 696)               | 91<br>(72 to 116)                       | -11.7<br>(-22.3 to -0.4)                                          | 46 606<br>(38 496 to 60 380)                  | 771<br>(638 to 992)                     | -25.3<br>(-29.0 to -21.7)                                         |
| Guatemala                          | 17 027<br>(13 540 to 21 433)            | 96<br>(77 to 119)                       | -16.6<br>(-25.4 to -7.5)                                          | 133 304<br>(111 302 to 168 467)               | 870<br>(733 to 1 088)                   | -24.2<br>(-27.3 to -20.6)                                         |
| Honduras                           | 10 193<br>(7 948 to 12 930)             | 98<br>(78 to 122)                       | 22.0<br>(9.9 to 33.6)                                             | 80 949<br>(68 016 to 103 007)                 | 941<br>(793 to 1 174)                   | 10.3<br>(6.2 to 14.9)                                             |
| Mexico                             | 103 991<br>(85 433 to 126 800)          | 84<br>(69 to 103)                       | -27.4<br>(-32.2 to -22.1)                                         | 41 344<br>(1 042 374 to 1 588 421)            | 846<br>(832 to 1 262)                   | -24.7<br>(-37.0 to -31.2)                                         |
| Nicaragua                          | 6 393<br>(4 990 to 8 182)               | 97<br>(76 to 123)                       | 4.9<br>(-5.8 to 16.7)                                             | 50 577<br>(41 844 to 66 179)                  | 844<br>(702 to 1 085)                   | -7.3<br>(-11.2 to -3.0)                                           |

| Location                                      | Incidence (95% UI)                            |                                         |                                                                   | Prevalence (95% UI)                              |                                         |                                                                   |
|-----------------------------------------------|-----------------------------------------------|-----------------------------------------|-------------------------------------------------------------------|--------------------------------------------------|-----------------------------------------|-------------------------------------------------------------------|
|                                               | 2017 counts                                   | 2017 age-standardised rates per 100,000 | Percentage change in age-standardised rates between 1990 and 2017 | 2017 counts                                      | 2017 age-standardised rates per 100,000 | Percentage change in age-standardised rates between 1990 and 2017 |
| Panama                                        | 3 794<br>(2 986 to 4 763)                     | 100<br>(78 to 125)                      | 14.8<br>(5.8 to 24.7)                                             | 32 527<br>(27 278 to 41 350)                     | 819<br>(687 to 1 042)                   | 1.6<br>(-2.6 to 5.8)                                              |
| Venezuela                                     | 33 581<br>(26 704 to 41 459)                  | 114<br>(90 to 142)                      | 10.5<br>(0.4 to 20.8)                                             | 293 963<br>(245 105 to 378 751)                  | 946<br>(791 to 1 217)                   | -1.2<br>(-5.2 to 3.0)                                             |
| <b>Tropical Latin America</b>                 | <b>144 365<br/>(123 808 to 167 622)</b>       | <b>69<br/>(59 to 81)</b>                | <b>-33.4<br/>(-36.4 to -30.1)</b>                                 | <b>1 972 596<br/>(1 689 689 to 2 307 851)</b>    | <b>837<br/>(717 to 982)</b>             | <b>-37.7<br/>(-38.7 to -36.5)</b>                                 |
| Brazil                                        | 138 318<br>(118 914 to 160 521)               | 68<br>(58 to 80)                        | -34.2<br>(-37.4 to -30.9)                                         | 1 922 962<br>(1 647 522 to 2 249 362)            | 838<br>(718 to 984)                     | -38.1<br>(-39.1 to -36.9)                                         |
| Paraguay                                      | 6 044<br>(4 929 to 7 323)                     | 86<br>(70 to 103)                       | -8.2<br>(-16.2 to -0.3)                                           | 49 633<br>(42 410 to 58 489)                     | 769<br>(660 to 899)                     | -16.0<br>(-19.0 to -12.7)                                         |
| <b>North Africa and Middle East</b>           | <b>970 054<br/>(809 558 to 1 167 472)</b>     | <b>155<br/>(129 to 185)</b>             | <b>-12.0<br/>(-18.6 to -5.6)</b>                                  | <b>8 155 575<br/>(6 907 068 to 9 510 849)</b>    | <b>1 460<br/>(1 242 to 1 701)</b>       | <b>-18.4<br/>(-21.3 to -15.6)</b>                                 |
| <b>North Africa and Middle East</b>           | <b>970 054<br/>(809 558 to 1 167 472)</b>     | <b>155<br/>(129 to 185)</b>             | <b>-12.0<br/>(-18.6 to -5.6)</b>                                  | <b>8 155 575<br/>(6 907 068 to 9 510 849)</b>    | <b>1 460<br/>(1 242 to 1 701)</b>       | <b>-18.4<br/>(-21.3 to -15.6)</b>                                 |
| Afghanistan                                   | 43 319<br>(34 546 to 54 349)                  | 115<br>(94 to 140)                      | 17.1<br>(8.4 to 25.6)                                             | 284 391<br>(246 426 to 322 100)                  | 1 245<br>(1 081 to 1 444)               | 17.2<br>(13.8 to 22.8)                                            |
| Algeria                                       | 64 036<br>(53 406 to 76 404)                  | 155<br>(129 to 187)                     | -18.0<br>(-26.2 to -9.6)                                          | 568 438<br>(485 738 to 662 035)                  | 1 423<br>(1 215 to 1 655)               | -24.8<br>(-28.8 to -20.8)                                         |
| Bahrain                                       | 2 624<br>(2 119 to 3 153)                     | 180<br>(148 to 218)                     | 33.4<br>(25.0 to 42.3)                                            | 25 554<br>(21 510 to 30 218)                     | 1 545<br>(1 309 to 1 822)               | 18.3<br>(13.4 to 23.6)                                            |
| Egypt                                         | 150 049<br>(125 373 to 181 023)               | 146<br>(122 to 175)                     | -10.5<br>(-18.6 to -1.7)                                          | 1 155 490<br>(977 792 to 1 342 276)              | 1 365<br>(1 162 to 1 580)               | -20.5<br>(-24.0 to -17.1)                                         |
| Iran                                          | 140 466<br>(117 880 to 166 800)               | 167<br>(141 to 199)                     | -23.0<br>(-36.7 to -27.6)                                         | 1 259 904<br>(1 069 195 to 1 477 384)            | 1 462<br>(1 238 to 1 709)               | -39.1<br>(-41.6 to -37.0)                                         |
| Iraq                                          | 68 583<br>(55 483 to 84 661)                  | 146<br>(119 to 177)                     | 10.0<br>(-20.3 to 1.1)                                            | 507 829<br>(435 041 to 596 233)                  | 1 440<br>(1 235 to 1 679)               | -11.3<br>(-15.4 to -7.8)                                          |
| Jordan                                        | 17 259<br>(14 077 to 20 966)                  | 150<br>(124 to 181)                     | -14.5<br>(-24.9 to -4.0)                                          | 121 586<br>(102 700 to 143 533)                  | 1 323<br>(1 129 to 1 555)               | -22.4<br>(-27.0 to -17.9)                                         |
| Kuwait                                        | 8 008<br>(6 576 to 9 701)                     | 183<br>(150 to 220)                     | 20.6<br>(2.8 to 20.6)                                             | 71 060<br>(59 990 to 85 515)                     | 1 546<br>(1 295 to 1 844)               | 10.1<br>(4.9 to 16.3)                                             |
| Lebanon                                       | 15 813<br>(13 141 to 19 113)                  | 176<br>(147 to 211)                     | -7.5<br>(-16.1 to 2.7)                                            | 117 676<br>(98 590 to 139 966)                   | 1 512<br>(1 272 to 1 786)               | -17.0<br>(-21.5 to -11.3)                                         |
| Libya                                         | 11 018<br>(9 216 to 13 162)                   | 153<br>(128 to 183)                     | -13.6<br>(-21.1 to -6.3)                                          | 88 503<br>(74 466 to 104 120)                    | 1 326<br>(1 123 to 1 559)               | -20.6<br>(-24.2 to -16.0)                                         |
| Morocco                                       | 51 347<br>(43 182 to 61 453)                  | 143<br>(119 to 170)                     | -20.0<br>(-27.3 to -11.9)                                         | 478 936<br>(408 570 to 555 606)                  | 1 335<br>(1 140 to 1 548)               | -26.3<br>(-29.6 to -22.3)                                         |
| Palestine                                     | 9 417<br>(7 607 to 11 576)                    | 177<br>(143 to 215)                     | 46.5<br>(35.6 to 58.9)                                            | 65 839<br>(55 976 to 77 455)                     | 1 708<br>(1 480 to 1 989)               | 41.2<br>(36.4 to 46.7)                                            |
| Oman                                          | 6 029<br>(6 423 to 9 999)                     | 166<br>(134 to 201)                     | 35.5<br>(25.2 to 45.6)                                            | 61 015<br>(50 572 to 72 980)                     | 1 398<br>(1 169 to 1 661)               | 20.8<br>(15.9 to 26.2)                                            |
| Qatar                                         | 5 023<br>(4 018 to 6 180)                     | 174<br>(143 to 210)                     | 12.8<br>(3.2 to 22.6)                                             | 41 974<br>(35 143 to 49 961)                     | 1 444<br>(1 220 to 1 698)               | -3.9<br>(-1.1 to 9.5)                                             |
| Saudi Arabia                                  | 61 754<br>(51 627 to 74 331)                  | 169<br>(141 to 202)                     | -23.1<br>(-30.5 to -15.4)                                         | 474 632<br>(398 902 to 561 117)                  | 1 391<br>(1 176 to 1 638)               | -21.7<br>(-35.5 to -18.0)                                         |
| Sudan                                         | 59 568<br>(48 991 to 72 398)                  | 135<br>(113 to 160)                     | -20.7<br>(-26.9 to -13.7)                                         | 554 994<br>(467 958 to 658 019)                  | 1 871<br>(1 595 to 1 772)               | -25.0<br>(-28.3 to -21.9)                                         |
| Syria                                         | 32 050<br>(25 880 to 39 976)                  | 167<br>(138 to 203)                     | 23.3<br>(10.5 to 35.8)                                            | 246 406<br>(209 435 to 290 419)                  | 1 505<br>(1 283 to 1 762)               | 12.3<br>(6.6 to 18.2)                                             |
| Tunisia                                       | 17 721<br>(14 681 to 21 228)                  | 159<br>(130 to 190)                     | -10.5<br>(-19.8 to -0.9)                                          | 175 589<br>(149 035 to 205 637)                  | 1 402<br>(1 192 to 1 638)               | -20.0<br>(-24.4 to -15.5)                                         |
| Turkey                                        | 141 919<br>(116 004 to 172 206)               | 179<br>(147 to 219)                     | 38.0<br>(29.2 to 48.0)                                            | 1 382 321<br>(1 155 233 to 1 623 241)            | 1 569<br>(1 312 to 1 819)               | 17.8<br>(11.9 to 24.7)                                            |
| United Arab Emirates                          | 16 156<br>(12 831 to 19 605)                  | 168<br>(139 to 201)                     | -1.9<br>(-10.5 to 6.7)                                            | 160 064<br>(133 562 to 190 172)                  | 1 888<br>(1 166 to 1 638)               | -11.5<br>(-16.5 to -5.6)                                          |
| Yemen                                         | 44 990<br>(36 961 to 54 667)                  | 137<br>(115 to 164)                     | -28.7<br>(-34.3 to -22.9)                                         | 305 757<br>(261 937 to 355 925)                  | 1 355<br>(1 172 to 1 562)               | -32.6<br>(-35.4 to -29.8)                                         |
| <b>South Asia</b>                             | <b>2 053 339<br/>(1 686 233 to 2 506 760)</b> | <b>110<br/>(91 to 133)</b>              | <b>0.1<br/>(-7.0 to 6.8)</b>                                      | <b>20 409 524<br/>(17 554 220 to 23 823 865)</b> | <b>1 237<br/>(1 064 to 1 442)</b>       | <b>-1.6<br/>(-4.1 to 0.9)</b>                                     |
| <b>South Asia</b>                             | <b>2 053 339<br/>(1 686 233 to 2 506 760)</b> | <b>110<br/>(91 to 133)</b>              | <b>0.1<br/>(-7.0 to 6.8)</b>                                      | <b>20 409 524<br/>(17 554 220 to 23 823 865)</b> | <b>1 237<br/>(1 064 to 1 442)</b>       | <b>-1.6<br/>(-4.1 to 0.9)</b>                                     |
| Bangladesh                                    | 179 400<br>(145 990 to 223 235)               | 109<br>(89 to 134)                      | -3.5<br>(-14.6 to 7.8)                                            | 1 630 435<br>(1 402 709 to 1 911 028)            | 1 102<br>(949 to 1 293)                 | -8.3<br>(-12.9 to -2.8)                                           |
| Bhutan                                        | 1 119<br>(910 to 1 375)                       | 107<br>(88 to 131)                      | -1.8<br>(-12.6 to 8.1)                                            | 9 649<br>(8 283 to 11 227)                       | 1 087<br>(936 to 1 261)                 | -9.8<br>(-14.6 to -5.2)                                           |
| India                                         | 1 589 628<br>(1 307 428 to 1 941 097)         | 110<br>(91 to 134)                      | -1.5<br>(-8.2 to 5.1)                                             | 16 500 527<br>(14 203 250 to 19 285 633)         | 1 264<br>(1 090 to 1 473)               | -2.5<br>(-5.1 to -0.1)                                            |
| Nepal                                         | 30 694<br>(25 026 to 37 840)                  | 97<br>(80 to 119)                       | -2.5<br>(-11.5 to 7.1)                                            | 274 906<br>(236 375 to 318 921)                  | 1 029<br>(888 to 1 192)                 | -4.9<br>(-8.8 to -0.2)                                            |
| Pakistan                                      | 252 498<br>(206 047 to 310 720)               | 111<br>(91 to 134)                      | 20.1<br>(11.4 to 28.9)                                            | 1 994 006<br>(1 702 327 to 2 316 468)            | 1 161<br>(996 to 1 347)                 | 18.1<br>(14.0 to 24.1)                                            |
| <b>Southeast Asia, East Asia, and Oceania</b> | <b>1 570 370<br/>(1 268 175 to 1 904 021)</b> | <b>78<br/>(63 to 96)</b>                | <b>-23.9<br/>(15.9 to 31.8)</b>                                   | <b>23 411 324<br/>(19 634 321 to 27 685 884)</b> | <b>918<br/>(766 to 1 089)</b>           | <b>-17.2<br/>(13.1 to 22.0)</b>                                   |
| <b>East Asia</b>                              | <b>1 385 196<br/>(1 121 266 to 1 679 792)</b> | <b>107<br/>(86 to 131)</b>              | <b>43.7<br/>(34.4 to 54.0)</b>                                    | <b>21 434 056<br/>(17 943 830 to 25 366 091)</b> | <b>1 162<br/>(967 to 1 381)</b>         | <b>28.4<br/>(23.4 to 34.2)</b>                                    |
| China                                         | 1 331 789<br>(1 078 274 to 1 615 908)         | 108<br>(87 to 133)                      | 46.0<br>(36.7 to 56.2)                                            | 20 680 371<br>(17 312 143 to 24 472 798)         | 1 179<br>(981 to 1 404)                 | 29.6<br>(24.6 to 35.6)                                            |
| North Korea                                   | 16 053<br>(19 037 to 19 601)                  | 69<br>(55 to 85)                        | 7.9<br>(-0.3 to 16.6)                                             | 201 050<br>(170 888 to 235 286)                  | 675<br>(575 to 793)                     | 7.1<br>(3.7 to 12.2)                                              |
| Taiwan (Province of China)                    | 15 040<br>(12 141 to 18 053)                  | 80<br>(64 to 99)                        | -23.4<br>(-32.6 to -12.3)                                         | 207 344<br>(173 633 to 247 015)                  | 684<br>(570 to 814)                     | -28.3<br>(-33.1 to -24.3)                                         |
| <b>Oceania</b>                                | <b>11 339<br/>(9 449 to 13 745)</b>           | <b>83<br/>(70 to 100)</b>               | <b>3.0<br/>(-3.6 to 10.1)</b>                                     | <b>91 658<br/>(79 259 to 106 019)</b>            | <b>871<br/>(756 to 1 001)</b>           | <b>2.6<br/>(-0.8 to 6.2)</b>                                      |
| American Samoa                                | 54<br>(44 to 67)                              | 96<br>(79 to 117)                       | 18.9<br>(10.7 to 27.8)                                            | 476<br>(403 to 560)                              | 917<br>(777 to 1 078)                   | 13.8<br>(9.1 to 18.5)                                             |
| Federated States of Micronesia                | 89<br>(73 to 109)                             | 81<br>(67 to 98)                        | 15.0<br>(5.6 to 24.8)                                             | 798<br>(684 to 925)                              | 845<br>(727 to 977)                     | 11.2<br>(5.9 to 16.7)                                             |
| Fiji                                          | 1 033<br>(882 to 1 210)                       | 111<br>(95 to 130)                      | 1.2<br>(-6.4 to 9.5)                                              | 9 940<br>(8 612 to 11 474)                       | 1 120<br>(970 to 1 293)                 | -1.3<br>(-5.5 to 3.6)                                             |
| Guam                                          | 164<br>(134 to 199)                           | 101<br>(82 to 122)                      | 30.1<br>(22.8 to 37.8)                                            | 1 610<br>(1 349 to 1 902)                        | 916<br>(768 to 1 081)                   | 25.7<br>(21.2 to 30.5)                                            |
| Kiribati                                      | 101<br>(81 to 125)                            | 79<br>(63 to 97)                        | 49.5<br>(38.0 to 60.1)                                            | 884<br>(763 to 1 026)                            | 878<br>(758 to 1 018)                   | 48.0<br>(42.6 to 54.1)                                            |
| Marshall Islands                              | 50<br>(41 to 60)                              | 82<br>(67 to 98)                        | 38.1<br>(8.7 to 27.5)                                             | 419<br>(357 to 488)                              | 635<br>(711 to 972)                     | 16.0<br>(11.0 to 21.2)                                            |
| Northern Mariana Islands                      | 41<br>(33 to 49)                              | 102<br>(83 to 122)                      | 11.9<br>(3.3 to 20.5)                                             | 469<br>(392 to 551)                              | 890<br>(738 to 1 047)                   | 7.8<br>(1.5 to 14.1)                                              |
| Papua New Guinea                              | 8 050<br>(6 675 to 9 819)                     | 79<br>(66 to 96)                        | 4.6<br>(-3.2 to 12.7)                                             | 62 837<br>(54 477 to 72 680)                     | 826<br>(717 to 950)                     | 3.0<br>(-1.2 to 7.2)                                              |
| Samoa                                         | 191<br>(154 to 236)                           | 91<br>(74 to 111)                       | 19.8<br>(11.0 to 28.8)                                            | 1 572<br>(1 355 to 1 812)                        | 932<br>(805 to 1 078)                   | 15.3<br>(11.1 to 19.8)                                            |
| Solomon Islands                               | 550<br>(451 to 673)                           | 79<br>(65 to 96)                        | 8.2<br>(-1.0 to 17.6)                                             | 4 370<br>(3 722 to 5 073)                        | 848<br>(732 to 984)                     | 9.2<br>(4.7 to 14.8)                                              |
| Tonga                                         | 123<br>(102 to 147)                           | 116<br>(99 to 137)                      | 10.2<br>(2.8 to 18.3)                                             | 1 056<br>(912 to 1 223)                          | 1 144<br>(989 to 1 326)                 | 6.4<br>(2.7 to 10.6)                                              |
| Vanuatu                                       | 268<br>(221 to 327)                           | 87<br>(72 to 105)                       | 8.2<br>(0.4 to 15.7)                                              | 2 176<br>(1 875 to 2 503)                        | 922<br>(795 to 1 060)                   | 8.9<br>(3.6 to 14.2)                                              |
| <b>Southeast Asia</b>                         | <b>173 835<br/>(138 150 to 214 303)</b>       | <b>27<br/>(21 to 33)</b>                | <b>-19.4<br/>(-25.2 to -13.3)</b>                                 | <b>1 885 610<br/>(1 593 460 to 2 237 486)</b>    | <b>281<br/>(238 to 333)</b>             | <b>-29.0<br/>(-31.6 to -25.4)</b>                                 |
| Cambodia                                      | 5 308<br>(4 310 to 6 518)                     | 32<br>(26 to 39)                        | -32.6<br>(-43.8 to -29.1)                                         | 47 578<br>(40 773 to 54 826)                     | 522<br>(427 to 369)                     | -39.6<br>(-42.6 to -36.2)                                         |
| Indonesia                                     | 43 568<br>(32 094 to 59 063)                  | 17<br>(13 to 23)                        | -44.8<br>(-52.0 to -36.1)                                         | 624 895<br>(513 873 to 759 744)                  | 241<br>(198 to 292)                     | -48.6<br>(-51.2 to -44.7)                                         |

| Location                           | Incidence (95% UI)                            |                                         |                                                                   | Prevalence (95% UI)                            |                                         |                                                                   |
|------------------------------------|-----------------------------------------------|-----------------------------------------|-------------------------------------------------------------------|------------------------------------------------|-----------------------------------------|-------------------------------------------------------------------|
|                                    | 2017 counts                                   | 2017 age-standardised rates per 100,000 | Percentage change in age-standardised rates between 1990 and 2017 | 2017 counts                                    | 2017 age-standardised rates per 100,000 | Percentage change in age-standardised rates between 1990 and 2017 |
| Laos                               | 2 342<br>(1 910 to 2 872)                     | 32<br>(26 to 39)                        | -46.3<br>(-52.2 to -40.1)                                         | 20 143<br>(17 400 to 23 394)                   | 327<br>(283 to 379)                     | -48.7<br>(-51.5 to -46.2)                                         |
| Malaysia                           | 10 669<br>(8 530 to 13 038)                   | 35<br>(28 to 43)                        | -19.0<br>(-27.4 to -10.6)                                         | 90 001<br>(76 310 to 106 055)                  | 297<br>(253 to 350)                     | -28.1<br>(-31.7 to -23.1)                                         |
| Maldives                           | 157<br>(126 to 194)                           | 34<br>(28 to 42)                        | -50.9<br>(-57.0 to -44.4)                                         | 1 294<br>(1 089 to 1 535)                      | 287<br>(243 to 339)                     | -58.1<br>(-60.7 to -55.1)                                         |
| Mauritius                          | 545<br>(459 to 642)                           | 46<br>(38 to 56)                        | -55.3<br>(-60.8 to -49.5)                                         | 6 228<br>(5 273 to 7 283)                      | 407<br>(344 to 477)                     | -59.1<br>(-61.6 to -56.3)                                         |
| Myanmar                            | 13 333<br>(10 485 to 16 708)                  | 25<br>(20 to 32)                        | 8.3<br>(-0.6 to 17.0)                                             | 135 878<br>(115 942 to 159 947)                | 257<br>(220 to 302)                     | -1.2<br>(-1.6 to 6.9)                                             |
| Philippines                        | 28 656<br>(22 866 to 35 670)                  | 27<br>(21 to 33)                        | -14.7<br>(-23.1 to -6.6)                                          | 238 089<br>(204 145 to 279 652)                | 252<br>(217 to 295)                     | -19.4<br>(-23.0 to -14.2)                                         |
| Sri Lanka                          | 8 451<br>(6 949 to 10 131)                    | 41<br>(33 to 49)                        | -29.5<br>(-37.0 to -21.6)                                         | 82 934<br>(69 810 to 96 500)                   | 350<br>(294 to 408)                     | -36.4<br>(-40.4 to -31.8)                                         |
| Seychelles                         | 59<br>(50 to 69)                              | 58<br>(50 to 68)                        | -18.4<br>(-24.4 to -12.4)                                         | 551<br>(475 to 639)                            | 490<br>(422 to 571)                     | -24.4<br>(-27.7 to -20.6)                                         |
| Thailand                           | 23 476<br>(19 170 to 28 300)                  | 37<br>(30 to 46)                        | 5.4<br>(-3.3 to 15.6)                                             | 274 615<br>(233 511 to 323 278)                | 116<br>(269 to 373)                     | -7.3<br>(-11.6 to -1.7)                                           |
| Timor-Leste                        | 425<br>(340 to 533)                           | 31<br>(25 to 38)                        | -38.9<br>(-45.9 to -31.2)                                         | 3 213<br>(2 749 to 3 776)                      | 309<br>(265 to 359)                     | -43.4<br>(-46.0 to -40.7)                                         |
| Vietnam                            | 36 617<br>(30 020 to 43 990)                  | 39<br>(32 to 48)                        | 33.1<br>(23.7 to 44.9)                                            | 357 709<br>(305 685 to 421 749)                | 353<br>(301 to 418)                     | 13.5<br>(8.4 to 20.3)                                             |
| <b>Sub-Saharan Africa</b>          | <b>1 413 990<br/>(1 152 708 to 1 741 406)</b> | <b>135<br/>(114 to 162)</b>             | <b>-10.4<br/>(-16.5 to -4.3)</b>                                  | <b>9 904 005<br/>(8 478 626 to 11 515 704)</b> | <b>1 347<br/>(1 162 to 1 545)</b>       | <b>-10.1<br/>(-12.4 to -7.7)</b>                                  |
| <b>Central sub-Saharan Africa</b>  | <b>157 036<br/>(127 446 to 194 089)</b>       | <b>126<br/>(106 to 151)</b>             | <b>-6.5<br/>(-13.3 to 0.4)</b>                                    | <b>1 081 118<br/>(929 091 to 1 257 250)</b>    | <b>1 239<br/>(1 072 to 1 422)</b>       | <b>6.5<br/>(-9.3 to -3.3)</b>                                     |
| Angola                             | 36 622<br>(29 898 to 45 201)                  | 129<br>(109 to 154)                     | -19.9<br>(-27.6 to -12.7)                                         | 236 389<br>(203 080 to 273 292)                | 1 243<br>(1 079 to 1 421)               | -20.8<br>(-23.9 to -17.3)                                         |
| Central African Republic           | 5 759<br>(4 728 to 7 081)                     | 120<br>(101 to 143)                     | -5.4<br>(-12.6 to 1.7)                                            | 42 955<br>(37 147 to 50 200)                   | 1 192<br>(1 035 to 1 382)               | -2.5<br>(-6.1 to 1.7)                                             |
| Congo (Brazzaville)                | 6 439<br>(5 306 to 7 830)                     | 128<br>(108 to 152)                     | -14.6<br>(-22.2 to -7.3)                                          | 49 080<br>(42 048 to 57 415)                   | 1 224<br>(1 059 to 1 425)               | -14.0<br>(-17.4 to -10.6)                                         |
| DR Congo                           | 104 087<br>(84 370 to 129 518)                | 126<br>(105 to 151)                     | -1.0<br>(-8.6 to 6.6)                                             | 723 415<br>(621 257 to 840 087)                | 1 241<br>(1 074 to 1 430)               | -0.8<br>(-4.0 to 2.9)                                             |
| Equatorial Guinea                  | 1 770<br>(1 435 to 2 204)                     | 129<br>(108 to 154)                     | -10.0<br>(-18.4 to -1.6)                                          | 10 487<br>(8 922 to 12 432)                    | 1 155<br>(992 to 1 339)                 | -18.6<br>(-22.1 to -15.1)                                         |
| Gabon                              | 2 358<br>(1 959 to 2 863)                     | 136<br>(115 to 163)                     | -16.7<br>(-23.8 to -9.7)                                          | 18 791<br>(16 203 to 22 023)                   | 1 290<br>(1 118 to 1 501)               | -15.9<br>(-18.8 to -12.4)                                         |
| <b>Eastern sub-Saharan Africa</b>  | <b>614 040<br/>(499 660 to 762 348)</b>       | <b>152<br/>(129 to 182)</b>             | <b>-9.6<br/>(-15.8 to -3.1)</b>                                   | <b>4 342 376<br/>(3 731 137 to 5 063 428)</b>  | <b>1 585<br/>(1 370 to 1 821)</b>       | <b>-7.5<br/>(-9.8 to -5.0)</b>                                    |
| Burundi                            | 17 323<br>(14 064 to 21 332)                  | 155<br>(130 to 184)                     | -19.9<br>(-27.3 to -11.8)                                         | 116 743<br>(100 218 to 135 860)                | 1 521<br>(1 317 to 1 739)               | -18.4<br>(-21.3 to -15.0)                                         |
| Comoros                            | 1 181<br>(978 to 1 429)                       | 161<br>(136 to 192)                     | -23.6<br>(-30.5 to -16.3)                                         | 9 618<br>(8 338 to 11 099)                     | 1 575<br>(1 371 to 1 801)               | -24.4<br>(-26.9 to -20.7)                                         |
| Djibouti                           | 1 782<br>(1 480 to 2 167)                     | 160<br>(135 to 191)                     | -18.5<br>(-25.2 to -10.7)                                         | 14 317<br>(12 366 to 16 530)                   | 1 526<br>(1 324 to 1 744)               | -19.9<br>(-22.5 to -16.8)                                         |
| Eritrea                            | 9 613<br>(7 886 to 11 837)                    | 161<br>(136 to 191)                     | -16.8<br>(-23.1 to -9.4)                                          | 67 460<br>(57 935 to 78 250)                   | 1 554<br>(1 350 to 1 780)               | -16.2<br>(-19.5 to -12.9)                                         |
| Ethiopia                           | 137 872<br>(110 708 to 173 116)               | 131<br>(109 to 158)                     | -19.9<br>(-26.1 to -13.1)                                         | 938 727<br>(809 707 to 1 087 402)              | 1 323<br>(1 147 to 1 512)               | -17.4<br>(-20.3 to -14.2)                                         |
| Kenya                              | 88 475<br>(72 244 to 109 252)                 | 180<br>(151 to 215)                     | 4.7<br>(-1.4 to 11.0)                                             | 820 740<br>(698 237 to 963 761)                | 2 386<br>(2 045 to 2 763)               | 5.5<br>(2.9 to 8.2)                                               |
| Madagascar                         | 43 174<br>(35 167 to 53 156)                  | 164<br>(139 to 195)                     | -17.4<br>(-25.2 to -9.4)                                          | 296 813<br>(255 944 to 343 638)                | 1 599<br>(1 389 to 1 828)               | -18.7<br>(-21.5 to -15.4)                                         |
| Malawi                             | 25 404<br>(20 468 to 31 824)                  | 161<br>(139 to 171)                     | -2.7<br>(-10.2 to 6.7)                                            | 171 202<br>(145 966 to 198 201)                | 1 382<br>(1 190 to 1 582)               | -2.0<br>(-5.5 to 2.5)                                             |
| Mozambique                         | 48 690<br>(39 499 to 60 069)                  | 159<br>(134 to 187)                     | -8.6<br>(-16.0 to -0.1)                                           | 303 499<br>(258 788 to 355 370)                | 1 487<br>(1 285 to 1 710)               | -15.0<br>(-18.2 to -10.8)                                         |
| Rwanda                             | 19 947<br>(16 274 to 24 649)                  | 156<br>(130 to 187)                     | -22.8<br>(-30.4 to -15.3)                                         | 141 451<br>(121 080 to 164 723)                | 1 504<br>(1 304 to 1 727)               | -23.2<br>(-26.6 to -18.9)                                         |
| Somalia                            | 27 414<br>(22 285 to 33 471)                  | 161<br>(136 to 191)                     | -7.3<br>(-13.9 to -0.9)                                           | 186 857<br>(161 055 to 214 905)                | 1 616<br>(1 407 to 1 837)               | -8.8<br>(-9.1 to -2.6)                                            |
| South Sudan                        | 18 746<br>(15 418 to 22 787)                  | 188<br>(159 to 219)                     | -4.5<br>(-10.8 to 1.6)                                            | 172 734<br>(105 858 to 141 432)                | 1 809<br>(1 585 to 2 065)               | -2.5<br>(-5.2 to 0.4)                                             |
| Tanzania                           | 88 041<br>(71 465 to 108 588)                 | 157<br>(131 to 187)                     | 1.6<br>(-5.5 to 8.8)                                              | 602 711<br>(517 967 to 701 098)                | 1 534<br>(1 325 to 1 763)               | 2.1<br>(-1.8 to 5.5)                                              |
| Uganda                             | 59 462<br>(47 754 to 74 943)                  | 147<br>(124 to 177)                     | -3.7<br>(-10.8 to 4.3)                                            | 369 942<br>(316 258 to 431 063)                | 1 440<br>(1 242 to 1 653)               | 0.1<br>(-3.9 to 4.0)                                              |
| Zambia                             | 26 533<br>(21 473 to 32 863)                  | 149<br>(125 to 177)                     | 12.0<br>(-1.9 to 3.8)                                             | 176 736<br>(151 352 to 207 541)                | 1 444<br>(1 252 to 1 660)               | -8.8<br>(-12.0 to -5.1)                                           |
| <b>Southern sub-Saharan Africa</b> | <b>137 781<br/>(115 442 to 166 331)</b>       | <b>174<br/>(148 to 208)</b>             | <b>-21.9<br/>(-27.1 to -16.9)</b>                                 | <b>1 114 603<br/>(960 254 to 1 290 061)</b>    | <b>1 588<br/>(1 373 to 1 874)</b>       | <b>-25.7<br/>(-28.3 to -22.9)</b>                                 |
| Botswana                           | 4 204<br>(3 484 to 5 119)                     | 178<br>(149 to 213)                     | -8.9<br>(-15.9 to -2.2)                                           | 32 835<br>(28 007 to 38 005)                   | 1 615<br>(1 384 to 1 855)               | -11.1<br>(-15.2 to -7.5)                                          |
| Lesotho                            | 3 762<br>(3 186 to 4 457)                     | 190<br>(163 to 222)                     | 12.1<br>(4.7 to 19.7)                                             | 28 469<br>(24 655 to 32 703)                   | 1 746<br>(1 515 to 1 999)               | 8.6<br>(4.3 to 13.7)                                              |
| Namibia                            | 4 309<br>(3 607 to 5 235)                     | 179<br>(152 to 213)                     | -3.5<br>(-20.7 to 6.0)                                            | 32 204<br>(27 779 to 37 251)                   | 1 667<br>(1 442 to 1 920)               | -15.9<br>(-19.2 to -12.2)                                         |
| South Africa                       | 99 021<br>(82 757 to 119 206)                 | 176<br>(147 to 210)                     | -28.6<br>(-33.8 to -23.4)                                         | 832 956<br>(717 120 to 968 809)                | 1 573<br>(1 358 to 1 826)               | -32.3<br>(-35.6 to -30.2)                                         |
| Swaziland                          | 2 079<br>(1 747 to 2 495)                     | 182<br>(155 to 214)                     | -5.0<br>(-11.9 to 1.6)                                            | 14 303<br>(12 356 to 16 478)                   | 1 653<br>(1 435 to 1 893)               | -9.5<br>(-13.0 to -6.7)                                           |
| Zimbabwe                           | 24 406<br>(20 139 to 29 467)                  | 163<br>(138 to 192)                     | 12.6<br>(5.7 to 19.4)                                             | 173 837<br>(150 535 to 200 731)                | 1 582<br>(1 382 to 1 818)               | 18.0<br>(14.6 to 22.4)                                            |
| <b>Western sub-Saharan Africa</b>  | <b>505 133<br/>(409 118 to 624 274)</b>       | <b>114<br/>(95 to 137)</b>              | <b>-2.1<br/>(-8.5 to 5.0)</b>                                     | <b>3 366 008<br/>(2 877 751 to 3 911 617)</b>  | <b>1 099<br/>(945 to 1 260)</b>         | <b>4.7<br/>(-7.4 to -1.7)</b>                                     |
| Benin                              | 13 336<br>(10 770 to 16 489)                  | 113<br>(95 to 136)                      | -6.6<br>(-14.3 to 1.3)                                            | 89 979<br>(76 958 to 105 488)                  | 1 122<br>(965 to 1 293)                 | -8.4<br>(-11.6 to -4.4)                                           |
| Burkina Faso                       | 25 735<br>(21 088 to 31 338)                  | 122<br>(103 to 143)                     | -10.4<br>(-17.4 to -2.5)                                          | 172 576<br>(148 627 to 201 488)                | 1 181<br>(1 026 to 1 356)               | -11.9<br>(-15.1 to -8.7)                                          |
| Cameroon                           | 31 302<br>(25 306 to 38 741)                  | 110<br>(92 to 132)                      | -10.3<br>(-17.5 to -3.1)                                          | 212 492<br>(182 263 to 247 450)                | 1 065<br>(919 to 1 226)                 | -11.5<br>(-14.9 to -7.6)                                          |
| Cape Verde                         | 661<br>(541 to 811)                           | 119<br>(98 to 143)                      | -1.6<br>(-9.3 to 6.3)                                             | 5 555<br>(4 708 to 6 492)                      | 1 079<br>(919 to 1 255)                 | -9.5<br>(-13.3 to -5.8)                                           |
| Chad                               | 17 922<br>(14 467 to 22 183)                  | 118<br>(99 to 140)                      | 4.0<br>(-2.7 to 10.4)                                             | 111 972<br>(95 857 to 130 357)                 | 1 170<br>(1 013 to 1 341)               | 2.7<br>(-0.4 to 6.3)                                              |
| Cote d'Ivoire                      | 28 824<br>(23 574 to 35 301)                  | 114<br>(96 to 136)                      | -7.9<br>(-15.4 to -0.5)                                           | 208 336<br>(180 075 to 240 369)                | 1 122<br>(974 to 1 282)                 | -7.3<br>(-10.2 to -4.1)                                           |
| The Gambia                         | 2 480<br>(2 002 to 3 082)                     | 114<br>(95 to 137)                      | -4.9<br>(-11.8 to 2.2)                                            | 16 852<br>(14 467 to 19 629)                   | 1 095<br>(946 to 1 259)                 | -6.0<br>(-8.9 to -2.5)                                            |
| Ghana                              | 35 819<br>(29 483 to 43 965)                  | 116<br>(97 to 138)                      | -2.9<br>(-9.5 to 4.7)                                             | 265 021<br>(228 117 to 309 918)                | 1 102<br>(950 to 1 271)                 | -7.0<br>(-10.5 to -3.1)                                           |
| Guinea                             | 13 831<br>(11 273 to 17 037)                  | 116<br>(98 to 139)                      | -8.2<br>(-15.6 to -0.9)                                           | 96 437<br>(83 272 to 110 674)                  | 1 156<br>(1 002 to 1 317)               | -10.7<br>(-13.6 to -7.2)                                          |
| Guinea-Bissau                      | 2 023<br>(1 638 to 2 502)                     | 108<br>(90 to 129)                      | -17.4<br>(-24.4 to -9.9)                                          | 13 998<br>(12 023 to 16 227)                   | 1 073<br>(928 to 1 231)                 | -17.7<br>(-21.1 to -14.2)                                         |
| Liberia                            | 5 215<br>(4 207 to 6 506)                     | 108<br>(89 to 130)                      | -5.1<br>(-13.0 to 2.6)                                            | 36 869<br>(31 925 to 42 657)                   | 1 061<br>(921 to 1 218)                 | -7.2<br>(-12.0 to -3.3)                                           |
| Mali                               | 24 101<br>(19 462 to 29 560)                  | 117<br>(98 to 139)                      | -11.7<br>(-17.4 to -1.3)                                          | 154 198<br>(132 725 to 180 431)                | 1 138<br>(988 to 1 312)                 | -11.9<br>(-16.0 to -8.0)                                          |
| Mauritania                         | 4 533<br>(3 648 to 5 615)                     | 113<br>(93 to 136)                      | -11.3<br>(-19.5 to -3.6)                                          | 31 726<br>(27 131 to 36 861)                   | 1 088<br>(937 to 1 250)                 | -12.7<br>(-16.2 to -8.8)                                          |

| Location              | Incidence (95% UI)              |                                         |                                                                   | Prevalence (95% UI)                   |                                         |                                                                   |
|-----------------------|---------------------------------|-----------------------------------------|-------------------------------------------------------------------|---------------------------------------|-----------------------------------------|-------------------------------------------------------------------|
|                       | 2017 counts                     | 2017 age-standardised rates per 100,000 | Percentage change in age-standardised rates between 1990 and 2017 | 2017 counts                           | 2017 age-standardised rates per 100,000 | Percentage change in age-standardised rates between 1990 and 2017 |
| Niger                 | 25 073<br>(20 081 to 31 118)    | 118<br>(99 to 141)                      | 9.0<br>(-17.0 to -1.0)                                            | 153 609<br>(132 365 to 178 604)       | 1175<br>(1019 to 1 347)                 | -10.6<br>(-13.8 to -7.2)                                          |
| Nigeria               | 240 091<br>(192 869 to 299 498) | 113<br>(93 to 136)                      | 4.3<br>(-2.6 to 12.9)                                             | 1 548 028<br>(1 315 914 to 1 799 406) | 1073<br>(920 to 1 233)                  | 0.4<br>(-3.3 to 4.2)                                              |
| Sao Tome and Principe | 238<br>(189 to 298)             | 112<br>(90 to 136)                      | 23.9<br>(16.5 to 32.8)                                            | 1 784<br>(1 515 to 2 089)             | 1 115<br>(951 to 1 290)                 | 15.6<br>(11.7 to 20.2)                                            |
| Senegal               | 16 678<br>(13 506 to 20 588)    | 113<br>(94 to 136)                      | -10.4<br>(-17.7 to -3.3)                                          | 121 399<br>(104 644 to 140 908)       | 1 118<br>(972 to 1 286)                 | -11.4<br>(-14.9 to -6.6)                                          |
| Sierra Leone          | 8 906<br>(7 286 to 10 956)      | 112<br>(94 to 133)                      | -7.1<br>(-14.3 to 1.0)                                            | 62 464<br>(53 598 to 72 409)          | 1 093<br>(945 to 1 253)                 | -9.6<br>(-13.1 to -5.9)                                           |
| Togo                  | 8 361<br>(6 819 to 10 334)      | 108<br>(90 to 131)                      | -6.0<br>(-13.4 to 1.8)                                            | 61 678<br>(52 612 to 71 662)          | 1 071<br>(922 to 1 234)                 | -7.6<br>(-11.3 to -3.6)                                           |
