# Supplementary material for: Epidemiology of injuries from fire, heat and hot substances: global, regional and national morbidity and mortality estimates from the Global Burden of Disease 2017 study
Source: PubMed Central journal article supplement (PMC7571358; doi:10.1136/injuryprev-2019-043299), 2019-12-18
Supplement: injuryprev-2019-043299supp004.pdf [file injuryprev-2019-043299supp004.pdf]

| Table 2: Mortality for 2017 and percentage change of age-standardised rates between 1990 and 2017 by location for fire, heat, and hot substances |                                        |                                         |                                                                   |
|--------------------------------------------------------------------------------------------------------------------------------------------------|----------------------------------------|-----------------------------------------|-------------------------------------------------------------------|
| Location                                                                                                                                         | Mortality (95% UI)                     |                                         |                                                                   |
|                                                                                                                                                  | 2017 counts                            | 2017 age-standardised rates per 100,000 | Percentage change in age-standardised rates between 1990 and 2017 |
| <b>Global</b>                                                                                                                                    | <b>120 632</b><br>(101 630 to 129 383) | <b>1.6</b><br>(1.3 to 1.7)              | <b>-46.6</b><br>(-49.7 to -38.8)                                  |
| <b>Low SDI</b>                                                                                                                                   | <b>29 548</b><br>(23 482 to 33 505)    | <b>3.0</b><br>(2.4 to 3.3)              | <b>-45.9</b><br>(-52.3 to -33.7)                                  |
| <b>Low-middle SDI</b>                                                                                                                            | <b>29 584</b><br>(22 729 to 33 290)    | <b>2.0</b><br>(1.6 to 2.3)              | <b>-43.8</b><br>(-50.3 to -32.8)                                  |
| <b>Middle SDI</b>                                                                                                                                | <b>23 369</b><br>(18 393 to 25 776)    | <b>1.2</b><br>(0.9 to 1.3)              | <b>-53.0</b><br>(-56.1 to -43.8)                                  |
| <b>High-middle SDI</b>                                                                                                                           | <b>22 495</b><br>(20 687 to 23 584)    | <b>1.4</b><br>(1.3 to 1.5)              | <b>-51.1</b><br>(-54.9 to -44.2)                                  |
| <b>High SDI</b>                                                                                                                                  | <b>15 374</b><br>(15 078 to 15 664)    | <b>0.8</b><br>(0.8 to 0.8)              | <b>-55.2</b><br>(-56.1 to -54.2)                                  |
| <b>Central Europe, Eastern Europe, and Central Asia</b>                                                                                          | <b>14 031</b><br>(13 610 to 14 503)    | <b>2.7</b><br>(2.6 to 2.8)              | <b>-30.8</b><br>(-32.8 to -28.3)                                  |
| <b>Central Asia</b>                                                                                                                              | <b>2 277</b><br>(2 082 to 2 555)       | <b>2.7</b><br>(2.4 to 3.0)              | <b>-49.1</b><br>(-53.3 to -43.8)                                  |
| Armenia                                                                                                                                          | 37<br>(34 to 39)                       | 1.0<br>(1.0 to 1.1)                     | -81.1<br>(-83.1 to -79.1)                                         |
| Azerbaijan                                                                                                                                       | 393<br>(293 to 608)                    | 4.1<br>(3.0 to 6.1)                     | -37.1<br>(-54.0 to -9.7)                                          |
| Georgia                                                                                                                                          | 178<br>(162 to 196)                    | 3.8<br>(3.4 to 4.1)                     | -38.4<br>(-44.6 to -30.7)                                         |
| Kazakhstan                                                                                                                                       | 434<br>(394 to 475)                    | 2.4<br>(2.2 to 2.6)                     | -53.1<br>(-57.8 to -48.2)                                         |
| Kyrgyzstan                                                                                                                                       | 96<br>(88 to 105)                      | 1.7<br>(1.6 to 1.8)                     | -61.9<br>(-65.7 to -57.8)                                         |
| Mongolia                                                                                                                                         | 101<br>(57 to 153)                     | 3.1<br>(1.8 to 4.5)                     | -10.4<br>(-52.0 to 58.3)                                          |
| Tajikistan                                                                                                                                       | 243<br>(185 to 351)                    | 2.8<br>(2.2 to 3.9)                     | -52.6<br>(-62.8 to -24.0)                                         |
| Turkmenistan                                                                                                                                     | 116<br>(101 to 131)                    | 2.4<br>(2.1 to 2.7)                     | -61.4<br>(-66.3 to -56.1)                                         |
| Uzbekistan                                                                                                                                       | 680<br>(605 to 766)                    | 2.3<br>(2.1 to 2.6)                     | -45.3<br>(-52.0 to -37.5)                                         |
| <b>Central Europe</b>                                                                                                                            | <b>1 754</b><br>(1 680 to 1 826)       | <b>1.0</b><br>(1.0 to 1.0)              | <b>-51.6</b><br>(-53.6 to -49.1)                                  |
| Albania                                                                                                                                          | 17<br>(13 to 25)                       | 0.5<br>(0.4 to 0.7)                     | -51.8<br>(-64.3 to -32.0)                                         |
| Bosnia and Herzegovina                                                                                                                           | 41<br>(33 to 51)                       | 0.8<br>(0.7 to 1.0)                     | -37.3<br>(-58.2 to -8.9)                                          |
| Bulgaria                                                                                                                                         | 109<br>(100 to 118)                    | 1.0<br>(0.9 to 1.1)                     | -47.4<br>(-52.2 to -42.2)                                         |
| Croatia                                                                                                                                          | 46<br>(42 to 49)                       | 0.6<br>(0.5 to 0.6)                     | -69.6<br>(-72.2 to -67.0)                                         |
| Czech Republic                                                                                                                                   | 147<br>(137 to 159)                    | 0.8<br>(0.7 to 0.9)                     | -36.6<br>(-41.4 to -30.9)                                         |
| Hungary                                                                                                                                          | 130<br>(121 to 141)                    | 0.8<br>(0.7 to 0.8)                     | -68.6<br>(-71.2 to -65.9)                                         |
| Macedonia                                                                                                                                        | 15<br>(11 to 18)                       | 0.5<br>(0.4 to 0.7)                     | -35.8<br>(-54.1 to -17.5)                                         |
| Montenegro                                                                                                                                       | 9<br>(7 to 10)                         | 1.0<br>(0.9 to 1.2)                     | -34.0<br>(-43.1 to -21.1)                                         |
| Poland                                                                                                                                           | 631<br>(580 to 679)                    | 1.1<br>(1.0 to 1.2)                     | -41.8<br>(-46.5 to -36.9)                                         |
| Romania                                                                                                                                          | 435<br>(407 to 464)                    | 1.5<br>(1.4 to 1.6)                     | -56.2<br>(-59.7 to -52.5)                                         |
| Serbia                                                                                                                                           | 109<br>(88 to 126)                     | 0.8<br>(0.7 to 0.9)                     | -44.2<br>(-52.5 to -27.7)                                         |
| Slovakia                                                                                                                                         | 53<br>(43 to 61)                       | 0.7<br>(0.6 to 0.8)                     | -52.5<br>(-63.1 to -43.6)                                         |
| Slovenia                                                                                                                                         | 12<br>(11 to 14)                       | 0.3<br>(0.3 to 0.4)                     | -62.8<br>(-66.6 to -58.4)                                         |

| Location                         | Mortality (95% UI)                         |                                         |                                                                   |
|----------------------------------|--------------------------------------------|-----------------------------------------|-------------------------------------------------------------------|
|                                  | 2017 counts                                | 2017 age-standardised rates per 100,000 | Percentage change in age-standardised rates between 1990 and 2017 |
| <b>Eastern Europe</b>            | <b>10 000</b><br><b>(9 714 to 10 259)</b>  | <b>3.6</b><br><b>(3.4 to 3.6)</b>       | <b>-19.2</b><br><b>(-21.5 to -16.9)</b>                           |
| Belarus                          | 623<br>(573 to 678)                        | 4.6<br>(4.3 to 5.0)                     | 0.0<br>(-10.1 to 11.5)                                            |
| Estonia                          | 57<br>(50 to 65)                           | 2.9<br>(2.5 to 3.3)                     | -65.8<br>(-70.7 to -60.0)                                         |
| Latvia                           | 120<br>(107 to 134)                        | 4.1<br>(3.6 to 4.5)                     | -50.5<br>(-56.0 to -43.6)                                         |
| Lithuania                        | 78<br>(71 to 85)                           | 1.8<br>(1.7 to 2.0)                     | -56.6<br>(-60.7 to -52.3)                                         |
| Moldova                          | 119<br>(111 to 127)                        | 2.5<br>(2.3 to 2.6)                     | -54.6<br>(-58.7 to -50.0)                                         |
| Russian Federation               | 7 063<br>(6 844 to 7 250)                  | 3.6<br>(3.5 to 3.7)                     | -15.5<br>(-19.2 to -12.7)                                         |
| Ukraine                          | 1 941<br>(1 820 to 2 072)                  | 3.3<br>(3.1 to 3.5)                     | -22.8<br>(-29.1 to -16.1)                                         |
| <b>High-income</b>               | <b>15 261</b><br><b>(14 963 to 15 526)</b> | <b>0.8</b><br><b>(0.8 to 0.8)</b>       | <b>-52.8</b><br><b>(-53.7 to -51.8)</b>                           |
| <b>Australasia</b>               | <b>185</b><br><b>(170 to 200)</b>          | <b>0.4</b><br><b>(0.4 to 0.5)</b>       | <b>-58.2</b><br><b>(-61.8 to -54.5)</b>                           |
| Australia                        | 162<br>(148 to 177)                        | 0.4<br>(0.4 to 0.5)                     | -57.2<br>(-61.5 to -52.8)                                         |
| New Zealand                      | 23<br>(21 to 24)                           | 0.4<br>(0.4 to 0.4)                     | -63.2<br>(-66.0 to -60.4)                                         |
| <b>High-income Asia-Pacific</b>  | <b>2 556</b><br><b>(2 457 to 2 645)</b>    | <b>0.7</b><br><b>(0.6 to 0.7)</b>       | <b>-54.8</b><br><b>(-56.8 to -52.9)</b>                           |
| Brunei                           | 6<br>(5 to 7)                              | 1.7<br>(1.5 to 2.0)                     | -46.4<br>(-55.6 to -36.4)                                         |
| Japan                            | 1 923<br>(1 853 to 1 992)                  | 0.6<br>(0.6 to 0.7)                     | -42.5<br>(-45.0 to -40.0)                                         |
| South Korea                      | 614<br>(563 to 662)                        | 0.9<br>(0.8 to 0.9)                     | -68.1<br>(-70.8 to -65.5)                                         |
| Singapore                        | 13<br>(12 to 14)                           | 0.2<br>(0.2 to 0.2)                     | -58.5<br>(-62.1 to -54.7)                                         |
| <b>High-income North America</b> | <b>6 023</b><br><b>(5 864 to 6 169)</b>    | <b>1.1</b><br><b>(1.1 to 1.2)</b>       | <b>-50.3</b><br><b>(-51.8 to -48.8)</b>                           |
| Canada                           | 515<br>(484 to 550)                        | 0.9<br>(0.8 to 0.9)                     | -55.6<br>(-58.6 to -52.1)                                         |
| Greenland                        | 2<br>(2 to 3)                              | 4.4<br>(3.8 to 5.4)                     | -59.8<br>(-68.1 to -37.8)                                         |
| USA                              | 5 505<br>(5 354 to 5 650)                  | 1.2<br>(1.1 to 1.2)                     | -49.7<br>(-51.3 to -48.1)                                         |
| <b>Southern Latin America</b>    | <b>1 203</b><br><b>(1 121 to 1 304)</b>    | <b>1.6</b><br><b>(1.5 to 1.7)</b>       | <b>-43.1</b><br><b>(-47.3 to -38.1)</b>                           |
| Argentina                        | 756<br>(688 to 835)                        | 1.5<br>(1.4 to 1.7)                     | -38.3<br>(-44.2 to -31.4)                                         |
| Chile                            | 362<br>(324 to 404)                        | 1.7<br>(1.5 to 1.9)                     | -56.6<br>(-61.3 to -51.2)                                         |
| Uruguay                          | 85<br>(76 to 94)                           | 1.7<br>(1.6 to 1.9)                     | -15.5<br>(-24.9 to -5.9)                                          |
| <b>Western Europe</b>            | <b>5 295</b><br><b>(5 140 to 5 440)</b>    | <b>0.6</b><br><b>(0.6 to 0.6)</b>       | <b>-56.5</b><br><b>(-58.1 to -55.1)</b>                           |
| Andorra                          | 1<br>(1 to 1)                              | 0.6<br>(0.5 to 0.8)                     | -46.6<br>(-60.2 to -27.3)                                         |
| Austria                          | 88<br>(82 to 94)                           | 0.5<br>(0.5 to 0.6)                     | -25.0<br>(-30.9 to -18.5)                                         |
| Belgium                          | 182<br>(169 to 195)                        | 0.8<br>(0.8 to 0.9)                     | -46.0<br>(-50.4 to -41.2)                                         |
| Cyprus                           | 12<br>(8 to 15)                            | 0.7<br>(0.5 to 0.9)                     | -55.9<br>(-62.0 to -47.2)                                         |
| Denmark                          | 99<br>(92 to 106)                          | 1.0<br>(0.9 to 1.0)                     | -20.3<br>(-27.0 to -13.2)                                         |
| Finland                          | 73<br>(68 to 79)                           | 0.8<br>(0.8 to 0.9)                     | -61.0<br>(-64.5 to -57.1)                                         |

| Location                           | Mortality (95% UI)                      |                                         |                                                                   |
|------------------------------------|-----------------------------------------|-----------------------------------------|-------------------------------------------------------------------|
|                                    | 2017 counts                             | 2017 age-standardised rates per 100,000 | Percentage change in age-standardised rates between 1990 and 2017 |
| France                             | 1 211<br>(1 134 to 1 292)               | 0.9<br>(0.8 to 0.9)                     | -60.6<br>(-63.4 to -57.7)                                         |
| Germany                            | 777<br>(706 to 855)                     | 0.5<br>(0.4 to 0.5)                     | -66.8<br>(-70.0 to -63.2)                                         |
| Greece                             | 142<br>(132 to 153)                     | 0.6<br>(0.6 to 0.7)                     | -48.8<br>(-53.0 to -44.6)                                         |
| Iceland                            | 3<br>(3 to 3)                           | 0.6<br>(0.6 to 0.6)                     | -48.1<br>(-52.2 to -43.6)                                         |
| Ireland                            | 41<br>(38 to 45)                        | 0.6<br>(0.6 to 0.7)                     | -67.8<br>(-71.1 to -64.7)                                         |
| Israel                             | 78<br>(72 to 84)                        | 0.7<br>(0.6 to 0.7)                     | -47.5<br>(-51.6 to -42.9)                                         |
| Italy                              | 907<br>(847 to 966)                     | 0.5<br>(0.5 to 0.6)                     | -51.3<br>(-54.6 to -47.5)                                         |
| Luxembourg                         | 5<br>(4 to 5)                           | 0.5<br>(0.4 to 0.5)                     | -59.7<br>(-64.0 to -54.8)                                         |
| Malta                              | 3<br>(2 to 3)                           | 0.4<br>(0.3 to 0.4)                     | -45.5<br>(-50.7 to -40.7)                                         |
| Netherlands                        | 153<br>(142 to 163)                     | 0.5<br>(0.4 to 0.5)                     | -56.9<br>(-60.4 to -53.4)                                         |
| Norway                             | 92<br>(89 to 95)                        | 1.0<br>(1.0 to 1.0)                     | -48.4<br>(-50.9 to -46.4)                                         |
| Portugal                           | 236<br>(227 to 246)                     | 1.3<br>(1.2 to 1.3)                     | -29.1<br>(-33.3 to -25.1)                                         |
| Spain                              | 343<br>(321 to 368)                     | 0.4<br>(0.4 to 0.4)                     | -65.5<br>(-68.2 to -62.6)                                         |
| Sweden                             | 176<br>(166 to 187)                     | 0.9<br>(0.8 to 0.9)                     | -35.4<br>(-39.6 to -31.0)                                         |
| Switzerland                        | 41<br>(38 to 45)                        | 0.3<br>(0.3 to 0.3)                     | -46.0<br>(-51.2 to -40.5)                                         |
| United Kingdom                     | 627<br>(615 to 637)                     | 0.5<br>(0.5 to 0.6)                     | -52.1<br>(-53.2 to -51.0)                                         |
| <b>Latin America and Caribbean</b> | <b>5 483</b><br><b>(5 250 to 5 730)</b> | <b>1.0</b><br><b>(0.9 to 1.0)</b>       | <b>-63.3</b><br><b>(-64.8 to -60.8)</b>                           |
| <b>Andean Latin America</b>        | <b>780</b><br><b>(667 to 960)</b>       | <b>1.3</b><br><b>(1.2 to 1.6)</b>       | <b>-59.3</b><br><b>(-65.8 to -45.5)</b>                           |
| Bolivia                            | 185<br>(136 to 236)                     | 1.9<br>(1.5 to 2.3)                     | -63.4<br>(-73.2 to -45.6)                                         |
| Ecuador                            | 216<br>(197 to 236)                     | 1.4<br>(1.3 to 1.5)                     | -53.3<br>(-58.0 to -48.3)                                         |
| Peru                               | 379<br>(288 to 517)                     | 1.2<br>(0.9 to 1.6)                     | -59.8<br>(-70.5 to -41.0)                                         |
| <b>Caribbean</b>                   | <b>751</b><br><b>(587 to 917)</b>       | <b>1.6</b><br><b>(1.2 to 2.0)</b>       | <b>-59.2</b><br><b>(-66.7 to -50.3)</b>                           |
| Antigua and Barbuda                | 2<br>(2 to 2)                           | 2.0<br>(1.8 to 2.2)                     | -57.8<br>(-62.4 to -53.1)                                         |
| The Bahamas                        | 9<br>(8 to 10)                          | 2.5<br>(2.3 to 2.8)                     | -54.9<br>(-60.1 to -49.8)                                         |
| Barbados                           | 5<br>(5 to 6)                           | 1.2<br>(1.1 to 1.3)                     | -57.5<br>(-61.7 to -53.2)                                         |
| Belize                             | 4<br>(4 to 5)                           | 1.3<br>(1.3 to 1.4)                     | -57.7<br>(-62.0 to -52.9)                                         |
| Bermuda                            | 0<br>(0 to 0)                           | 0.2<br>(0.2 to 0.3)                     | -68.6<br>(-72.2 to -65.1)                                         |
| Cuba                               | 110<br>(99 to 122)                      | 0.6<br>(0.6 to 0.7)                     | -78.5<br>(-80.6 to -76.0)                                         |
| Dominica                           | 2<br>(1 to 2)                           | 1.9<br>(1.8 to 2.1)                     | -45.7<br>(-51.2 to -39.2)                                         |
| Dominican Republic                 | 132<br>(106 to 167)                     | 1.4<br>(1.1 to 1.7)                     | -46.0<br>(-56.6 to -27.8)                                         |
| Grenada                            | 3<br>(3 to 3)                           | 2.0<br>(1.8 to 2.2)                     | -61.6<br>(-65.5 to -57.4)                                         |
| Guyana                             | 13<br>(12 to 15)                        | 2.1<br>(1.9 to 2.4)                     | -54.8<br>(-60.5 to -49.0)                                         |

| Location                            | Mortality (95% UI)                        |                                         |                                                                   |
|-------------------------------------|-------------------------------------------|-----------------------------------------|-------------------------------------------------------------------|
|                                     | 2017 counts                               | 2017 age-standardised rates per 100,000 | Percentage change in age-standardised rates between 1990 and 2017 |
| Haiti                               | 323<br>(182 to 468)                       | 3.6<br>(2.2 to 5.0)                     | -59.1<br>(-72.2 to -39.8)                                         |
| Jamaica                             | 35<br>(30 to 39)                          | 1.2<br>(1.0 to 1.3)                     | -9.6<br>(-23.2 to 4.1)                                            |
| Puerto Rico                         | 44<br>(41 to 47)                          | 0.7<br>(0.6 to 0.7)                     | -60.4<br>(-63.7 to -56.9)                                         |
| Saint Lucia                         | 3<br>(3 to 3)                             | 1.6<br>(1.4 to 1.7)                     | -64.7<br>(-68.0 to -61.2)                                         |
| Saint Vincent and the Grenadines    | 2<br>(2 to 2)                             | 1.8<br>(1.7 to 1.9)                     | -56.1<br>(-60.0 to -51.8)                                         |
| Suriname                            | 10<br>(9 to 11)                           | 1.9<br>(1.7 to 2.0)                     | -59.1<br>(-64.0 to -53.9)                                         |
| Trinidad and Tobago                 | 24<br>(21 to 28)                          | 1.7<br>(1.4 to 1.9)                     | -44.1<br>(-52.8 to -34.5)                                         |
| Virgin Islands                      | 2<br>(2 to 2)                             | 1.3<br>(1.1 to 1.4)                     | -52.1<br>(-59.5 to -45.0)                                         |
| <b>Central Latin America</b>        | <b>2 211</b><br><b>(2 092 to 2 285)</b>   | <b>0.9</b><br><b>(0.9 to 1.0)</b>       | <b>-62.3</b><br><b>(-65.1 to -60.9)</b>                           |
| Colombia                            | 217<br>(194 to 242)                       | 0.4<br>(0.4 to 0.5)                     | -80.2<br>(-82.5 to -77.9)                                         |
| Costa Rica                          | 42<br>(39 to 46)                          | 0.9<br>(0.8 to 0.9)                     | -35.3<br>(-41.8 to -29.2)                                         |
| El Salvador                         | 50<br>(37 to 74)                          | 0.8<br>(0.6 to 1.2)                     | -61.8<br>(-74.2 to -37.2)                                         |
| Guatemala                           | 263<br>(235 to 292)                       | 2.0<br>(1.8 to 2.2)                     | -41.6<br>(-48.1 to -35.1)                                         |
| Honduras                            | 46<br>(35 to 59)                          | 0.6<br>(0.5 to 0.8)                     | -50.0<br>(-61.3 to -34.2)                                         |
| Mexico                              | 1 322<br>(1 229 to 1 365)                 | 1.2<br>(1.1 to 1.2)                     | -60.1<br>(-63.6 to -58.5)                                         |
| Nicaragua                           | 27<br>(22 to 38)                          | 0.5<br>(0.4 to 0.7)                     | -69.1<br>(-77.9 to -49.8)                                         |
| Panama                              | 25<br>(22 to 27)                          | 0.6<br>(0.6 to 0.7)                     | -46.7<br>(-52.2 to -40.5)                                         |
| Venezuela                           | 219<br>(189 to 253)                       | 0.8<br>(0.7 to 0.9)                     | -53.1<br>(-59.3 to -46.0)                                         |
| <b>Tropical Latin America</b>       | <b>1 742</b><br><b>(1 696 to 1 788)</b>   | <b>0.8</b><br><b>(0.8 to 0.8)</b>       | <b>-66.8</b><br><b>(-68.2 to -65.5)</b>                           |
| Brazil                              | 1 684<br>(1 644 to 1 728)                 | 0.8<br>(0.8 to 0.8)                     | -67.3<br>(-68.6 to -65.9)                                         |
| Paraguay                            | 57<br>(47 to 72)                          | 1.0<br>(0.8 to 1.2)                     | -42.7<br>(-53.3 to -30.1)                                         |
| <b>North Africa and Middle East</b> | <b>10 525</b><br><b>(7 384 to 12 427)</b> | <b>1.9</b><br><b>(1.3 to 2.2)</b>       | <b>-60.2</b><br><b>(-66.0 to -50.8)</b>                           |
| <b>North Africa and Middle East</b> | <b>10 525</b><br><b>(7 384 to 12 427)</b> | <b>1.9</b><br><b>(1.3 to 2.2)</b>       | <b>-60.2</b><br><b>(-66.0 to -50.8)</b>                           |
| Afghanistan                         | 485<br>(383 to 614)                       | 2.0<br>(1.6 to 2.3)                     | -40.4<br>(-58.5 to 43.0)                                          |
| Algeria                             | 736<br>(373 to 1 131)                     | 1.9<br>(1.0 to 2.9)                     | -58.4<br>(-65.6 to -48.0)                                         |
| Bahrain                             | 10<br>(8 to 14)                           | 1.0<br>(0.7 to 1.4)                     | -31.4<br>(-62.0 to 7.5)                                           |
| Egypt                               | 2 002<br>(1 382 to 2 583)                 | 2.3<br>(1.7 to 2.9)                     | -45.9<br>(-54.6 to -31.6)                                         |
| Iran                                | 1 940<br>(1 648 to 2 157)                 | 2.5<br>(2.1 to 2.8)                     | -68.9<br>(-75.9 to -53.2)                                         |
| Iraq                                | 429<br>(361 to 512)                       | 1.0<br>(0.9 to 1.3)                     | -72.6<br>(-81.3 to -37.5)                                         |
| Jordan                              | 132<br>(110 to 162)                       | 1.5<br>(1.3 to 1.8)                     | -63.1<br>(-69.9 to -51.4)                                         |
| Kuwait                              | 32<br>(29 to 35)                          | 0.9<br>(0.8 to 0.9)                     | -40.3<br>(-46.7 to -33.7)                                         |
| Lebanon                             | 112<br>(53 to 192)                        | 1.5<br>(0.7 to 2.4)                     | -71.9<br>(-80.2 to -63.2)                                         |

| Location                                      | Mortality (95% UI)                         |                                         |                                                                   |
|-----------------------------------------------|--------------------------------------------|-----------------------------------------|-------------------------------------------------------------------|
|                                               | 2017 counts                                | 2017 age-standardised rates per 100,000 | Percentage change in age-standardised rates between 1990 and 2017 |
| Libya                                         | 135<br>(40 to 218)                         | 2.2<br>(0.7 to 3.5)                     | -45.6<br>(-68.1 to -17.7)                                         |
| Morocco                                       | 851<br>(412 to 1 239)                      | 2.5<br>(1.2 to 3.7)                     | -55.0<br>(-64.2 to -42.7)                                         |
| Palestine                                     | 26<br>(19 to 41)                           | 0.8<br>(0.6 to 1.0)                     | -63.0<br>(-74.2 to -40.5)                                         |
| Oman                                          | 18<br>(14 to 25)                           | 0.7<br>(0.4 to 0.8)                     | -55.8<br>(-69.6 to -29.6)                                         |
| Qatar                                         | 20<br>(13 to 28)                           | 1.0<br>(0.7 to 1.3)                     | -53.0<br>(-68.3 to -26.4)                                         |
| Saudi Arabia                                  | 710<br>(489 to 938)                        | 2.5<br>(1.7 to 3.3)                     | -59.1<br>(-77.0 to -30.7)                                         |
| Sudan                                         | 1 121<br>(483 to 1 752)                    | 3.1<br>(1.4 to 4.7)                     | -63.5<br>(-73.4 to -40.7)                                         |
| Syria                                         | 137<br>(105 to 181)                        | 0.9<br>(0.7 to 1.2)                     | -66.8<br>(-77.3 to -50.9)                                         |
| Tunisia                                       | 173<br>(84 to 284)                         | 1.5<br>(0.7 to 2.5)                     | -60.4<br>(-69.5 to -46.5)                                         |
| Turkey                                        | 420<br>(319 to 490)                        | 0.5<br>(0.4 to 0.6)                     | -63.9<br>(-76.1 to -48.1)                                         |
| United Arab Emirates                          | 145<br>(100 to 197)                        | 2.9<br>(1.3 to 4.3)                     | -46.1<br>(-66.2 to -21.4)                                         |
| Yemen                                         | 881<br>(402 to 1 411)                      | 3.5<br>(1.6 to 5.6)                     | -58.6<br>(-71.6 to -20.1)                                         |
| <b>South Asia</b>                             | <b>31 684</b><br><b>(23 098 to 36 828)</b> | <b>2.0</b><br><b>(1.5 to 2.3)</b>       | <b>-44.5</b><br><b>(-50.9 to -34.2)</b>                           |
| <b>South Asia</b>                             | <b>31 684</b><br><b>(23 098 to 36 828)</b> | <b>2.0</b><br><b>(1.5 to 2.3)</b>       | <b>-44.5</b><br><b>(-50.9 to -34.2)</b>                           |
| Bangladesh                                    | 1 671<br>(1 337 to 2 276)                  | 1.3<br>(1.1 to 1.6)                     | -74.3<br>(-81.0 to -56.9)                                         |
| Bhutan                                        | 10<br>(6 to 15)                            | 1.2<br>(0.8 to 1.8)                     | -64.2<br>(-74.7 to -48.3)                                         |
| India                                         | 27 027<br>(18 672 to 31 468)               | 2.2<br>(1.6 to 2.5)                     | -39.8<br>(-48.9 to -26.0)                                         |
| Nepal                                         | 373<br>(256 to 538)                        | 1.5<br>(1.1 to 2.1)                     | -54.8<br>(-66.4 to -38.4)                                         |
| Pakistan                                      | 2 603<br>(1 909 to 3 899)                  | 1.4<br>(1.1 to 2.1)                     | -38.1<br>(-53.5 to -16.6)                                         |
| <b>Southeast Asia, East Asia, and Oceania</b> | <b>17 752</b><br><b>(14 803 to 19 545)</b> | <b>0.8</b><br><b>(0.7 to 0.9)</b>       | <b>-58.7</b><br><b>(-62.4 to -47.7)</b>                           |
| <b>East Asia</b>                              | <b>11 545</b><br><b>(9 244 to 12 783)</b>  | <b>0.7</b><br><b>(0.6 to 0.8)</b>       | <b>-64.6</b><br><b>(-68.3 to -52.3)</b>                           |
| China                                         | 10 836<br>(8 528 to 12 024)                | 0.7<br>(0.6 to 0.8)                     | -64.9<br>(-68.7 to -51.9)                                         |
| North Korea                                   | 312<br>(200 to 454)                        | 1.2<br>(0.8 to 1.8)                     | -22.0<br>(-43.8 to 3.4)                                           |
| Taiwan (Province of China)                    | 211<br>(199 to 225)                        | 0.7<br>(0.6 to 0.7)                     | -75.1<br>(-76.8 to -73.3)                                         |
| <b>Oceania</b>                                | <b>339</b><br><b>(208 to 452)</b>          | <b>3.2</b><br><b>(2.2 to 4.1)</b>       | <b>-21.6</b><br><b>(-35.9 to -4.1)</b>                            |
| American Samoa                                | 1<br>(0 to 1)                              | 1.2<br>(1.0 to 1.4)                     | -33.8<br>(-50.7 to -7.6)                                          |
| Federated States of Micronesia                | 1<br>(1 to 2)                              | 1.8<br>(1.2 to 2.4)                     | -33.0<br>(-53.1 to -9.9)                                          |
| Fiji                                          | 31<br>(26 to 36)                           | 4.1<br>(3.5 to 4.7)                     | -13.7<br>(-39.8 to 10.6)                                          |
| Guam                                          | 1<br>(1 to 1)                              | 0.7<br>(0.6 to 0.9)                     | -27.3<br>(-43.1 to 1.2)                                           |
| Kiribati                                      | 1<br>(1 to 1)                              | 0.9<br>(0.7 to 1.1)                     | -16.5<br>(-37.2 to 13.7)                                          |
| Marshall Islands                              | 1<br>(1 to 1)                              | 2.3<br>(1.5 to 3.0)                     | -20.7<br>(-46.9 to 6.8)                                           |
| Northern Mariana Islands                      | 0<br>(0 to 1)                              | 1.1<br>(0.9 to 1.3)                     | -41.5<br>(-55.4 to -21.6)                                         |

| Location                          | Mortality (95% UI)                         |                                         |                                                                   |
|-----------------------------------|--------------------------------------------|-----------------------------------------|-------------------------------------------------------------------|
|                                   | 2017 counts                                | 2017 age-standardised rates per 100,000 | Percentage change in age-standardised rates between 1990 and 2017 |
| Papua New Guinea                  | 260<br>(139 to 363)                        | 3.3<br>(1.9 to 4.4)                     | -23.1<br>(-38.4 to 0.5)                                           |
| Samoa                             | 3<br>(2 to 4)                              | 1.6<br>(1.1 to 2.5)                     | -19.0<br>(-37.3 to 3.8)                                           |
| Solomon Islands                   | 12<br>(9 to 17)                            | 2.4<br>(1.9 to 3.4)                     | -25.9<br>(-44.3 to -1.7)                                          |
| Tonga                             | 3<br>(2 to 4)                              | 3.5<br>(2.8 to 4.4)                     | -21.7<br>(-38.5 to -0.9)                                          |
| Vanuatu                           | 5<br>(3 to 8)                              | 2.3<br>(1.5 to 3.3)                     | -17.8<br>(-41.1 to 14.6)                                          |
| <b>Southeast Asia</b>             | <b>5 869</b><br><b>(5 183 to 6 489)</b>    | <b>1.0</b><br><b>(0.9 to 1.1)</b>       | <b>-47.3</b><br><b>(-52.4 to -38.0)</b>                           |
| Cambodia                          | 255<br>(190 to 347)                        | 2.0<br>(1.5 to 2.7)                     | -62.0<br>(-72.6 to -40.8)                                         |
| Indonesia                         | 1 759<br>(1 473 to 1 931)                  | 0.8<br>(0.7 to 0.9)                     | -55.2<br>(-64.4 to -35.8)                                         |
| Laos                              | 136<br>(92 to 182)                         | 2.3<br>(1.6 to 3.1)                     | -64.7<br>(-75.3 to -37.7)                                         |
| Malaysia                          | 389<br>(283 to 447)                        | 1.5<br>(1.1 to 1.8)                     | -42.7<br>(-55.0 to -32.0)                                         |
| Maldives                          | 4<br>(4 to 6)                              | 1.2<br>(1.1 to 1.5)                     | -76.4<br>(-82.1 to -53.9)                                         |
| Mauritius                         | 27<br>(25 to 30)                           | 2.0<br>(1.8 to 2.2)                     | -70.0<br>(-72.7 to -66.9)                                         |
| Myanmar                           | 321<br>(246 to 462)                        | 0.7<br>(0.5 to 1.0)                     | -55.5<br>(-68.1 to -32.6)                                         |
| Philippines                       | 1 187<br>(1 055 to 1 335)                  | 1.6<br>(1.4 to 1.8)                     | -23.6<br>(-32.6 to -13.5)                                         |
| Sri Lanka                         | 419<br>(338 to 529)                        | 2.0<br>(1.6 to 2.4)                     | -49.0<br>(-58.2 to -35.9)                                         |
| Seychelles                        | 4<br>(3 to 4)                              | 3.8<br>(3.0 to 4.3)                     | -28.0<br>(-47.0 to -4.1)                                          |
| Thailand                          | 812<br>(586 to 978)                        | 1.0<br>(0.7 to 1.2)                     | -32.0<br>(-60.8 to 4.4)                                           |
| Timor-Leste                       | 18<br>(12 to 25)                           | 1.8<br>(1.2 to 2.4)                     | -64.6<br>(-77.1 to -46.2)                                         |
| Vietnam                           | 531<br>(443 to 657)                        | 0.6<br>(0.5 to 0.7)                     | -44.2<br>(-56.5 to -26.8)                                         |
| <b>Sub-Saharan Africa</b>         | <b>25 897</b><br><b>(20 839 to 29 327)</b> | <b>3.7</b><br><b>(3.0 to 4.3)</b>       | <b>-38.8</b><br><b>(-46.2 to -24.6)</b>                           |
| <b>Central sub-Saharan Africa</b> | <b>3 152</b><br><b>(1 938 to 4 169)</b>    | <b>3.7</b><br><b>(2.4 to 4.7)</b>       | <b>-38.9</b><br><b>(-53.0 to -14.9)</b>                           |
| Angola                            | 711<br>(549 to 916)                        | 3.8<br>(2.9 to 4.6)                     | -55.1<br>(-67.1 to -19.1)                                         |
| Central African Republic          | 177<br>(79 to 282)                         | 5.3<br>(2.7 to 7.7)                     | -26.9<br>(-47.5 to 4.8)                                           |
| Congo (Brazzaville)               | 115<br>(71 to 155)                         | 3.6<br>(2.1 to 4.7)                     | -45.7<br>(-57.7 to -22.5)                                         |
| DR Congo                          | 2 093<br>(1 106 to 2 927)                  | 3.6<br>(2.0 to 4.8)                     | -31.6<br>(-48.8 to -8.3)                                          |
| Equatorial Guinea                 | 20<br>(13 to 30)                           | 2.7<br>(1.8 to 4.0)                     | -64.5<br>(-78.3 to -31.9)                                         |
| Gabon                             | 35<br>(23 to 52)                           | 2.9<br>(1.9 to 4.1)                     | -47.8<br>(-61.5 to -19.9)                                         |
| <b>Eastern sub-Saharan Africa</b> | <b>9 574</b><br><b>(7 988 to 11 487)</b>   | <b>4.0</b><br><b>(3.4 to 4.7)</b>       | <b>-43.6</b><br><b>(-51.9 to -24.4)</b>                           |
| Burundi                           | 331<br>(231 to 438)                        | 5.2<br>(3.7 to 6.8)                     | -42.2<br>(-56.7 to -19.1)                                         |
| Comoros                           | 19<br>(15 to 26)                           | 3.9<br>(3.0 to 5.0)                     | -47.3<br>(-60.3 to -26.9)                                         |
| Djibouti                          | 26<br>(17 to 42)                           | 3.8<br>(2.6 to 5.8)                     | -46.4<br>(-62.6 to -20.3)                                         |
| Eritrea                           | 176<br>(125 to 219)                        | 5.4<br>(3.9 to 6.6)                     | -42.6<br>(-55.9 to -19.6)                                         |

| Location                           | Mortality (95% UI)                        |                                         |                                                                   |
|------------------------------------|-------------------------------------------|-----------------------------------------|-------------------------------------------------------------------|
|                                    | 2017 counts                               | 2017 age-standardised rates per 100,000 | Percentage change in age-standardised rates between 1990 and 2017 |
| Ethiopia                           | 2 013<br>(1 651 to 2 659)                 | 3.4<br>(2.8 to 4.4)                     | -56.7<br>(-66.8 to -30.6)                                         |
| Kenya                              | 1 003<br>(836 to 1 371)                   | 3.8<br>(3.3 to 5.0)                     | -35.9<br>(-52.2 to -17.0)                                         |
| Madagascar                         | 682<br>(506 to 888)                       | 4.4<br>(3.3 to 5.8)                     | -36.9<br>(-48.8 to -20.8)                                         |
| Malawi                             | 418<br>(341 to 519)                       | 3.8<br>(3.2 to 4.6)                     | -42.2<br>(-58.4 to 1.4)                                           |
| Mozambique                         | 899<br>(719 to 1 139)                     | 5.2<br>(4.3 to 6.4)                     | -40.3<br>(-52.8 to -18.5)                                         |
| Rwanda                             | 319<br>(234 to 490)                       | 4.2<br>(3.2 to 6.1)                     | -52.5<br>(-65.2 to -27.0)                                         |
| Somalia                            | 550<br>(376 to 817)                       | 5.6<br>(4.0 to 8.4)                     | -30.4<br>(-52.6 to 14.7)                                          |
| South Sudan                        | 428<br>(265 to 639)                       | 6.5<br>(4.1 to 9.8)                     | -23.8<br>(-44.9 to 16.2)                                          |
| Tanzania                           | 1 460<br>(1 179 to 1 933)                 | 3.7<br>(3.2 to 4.6)                     | -31.7<br>(-45.0 to -5.1)                                          |
| Uganda                             | 823<br>(619 to 1 103)                     | 3.7<br>(2.9 to 4.8)                     | -39.4<br>(-54.0 to -16.4)                                         |
| Zambia                             | 422<br>(342 to 530)                       | 4.2<br>(3.5 to 4.9)                     | -46.2<br>(-57.6 to -20.9)                                         |
| <b>Southern sub-Saharan Africa</b> | <b>2 815</b><br><b>(2 324 to 3 413)</b>   | <b>4.3</b><br><b>(3.6 to 5.1)</b>       | <b>-41.2</b><br><b>(-51.3 to -33.2)</b>                           |
| Botswana                           | 63<br>(43 to 99)                          | 3.7<br>(2.7 to 5.2)                     | -42.0<br>(-55.4 to -21.4)                                         |
| Lesotho                            | 108<br>(80 to 136)                        | 7.2<br>(5.3 to 9.0)                     | -5.8<br>(-45.9 to 32.3)                                           |
| Namibia                            | 75<br>(58 to 105)                         | 4.2<br>(3.3 to 5.6)                     | -46.2<br>(-56.4 to -29.0)                                         |
| South Africa                       | 1 928<br>(1 534 to 2 451)                 | 3.9<br>(3.2 to 4.8)                     | -49.7<br>(-57.9 to -39.6)                                         |
| Swaziland                          | 48<br>(36 to 62)                          | 5.9<br>(4.4 to 7.5)                     | -23.1<br>(-45.2 to 0.8)                                           |
| Zimbabwe                           | 592<br>(429 to 738)                       | 6.6<br>(4.5 to 8.5)                     | 7.0<br>(-30.6 to 38.7)                                            |
| <b>Western sub-Saharan Africa</b>  | <b>10 355</b><br><b>(7 124 to 13 044)</b> | <b>3.4</b><br><b>(2.5 to 4.1)</b>       | <b>-31.1</b><br><b>(-43.3 to -12.5)</b>                           |
| Benin                              | 260<br>(173 to 364)                       | 3.5<br>(2.4 to 4.8)                     | -33.7<br>(-50.2 to -14.2)                                         |
| Burkina Faso                       | 739<br>(556 to 976)                       | 4.7<br>(3.8 to 5.7)                     | -33.8<br>(-46.1 to -15.4)                                         |
| Cameroon                           | 562<br>(325 to 749)                       | 3.4<br>(1.9 to 4.6)                     | -33.0<br>(-53.3 to -11.3)                                         |
| Cape Verde                         | 7<br>(6 to 8)                             | 1.4<br>(1.2 to 1.7)                     | -49.1<br>(-62.7 to -25.1)                                         |
| Chad                               | 549<br>(340 to 825)                       | 4.9<br>(3.3 to 7.9)                     | -8.8<br>(-31.3 to 18.3)                                           |
| Cote d'Ivoire                      | 742<br>(581 to 930)                       | 4.7<br>(3.9 to 5.7)                     | -30.1<br>(-45.4 to -7.7)                                          |
| The Gambia                         | 48<br>(36 to 65)                          | 3.7<br>(2.7 to 4.6)                     | -27.7<br>(-46.9 to -5.9)                                          |
| Ghana                              | 639<br>(523 to 797)                       | 3.4<br>(2.8 to 4.0)                     | -22.3<br>(-41.9 to -1.1)                                          |
| Guinea                             | 363<br>(238 to 494)                       | 4.5<br>(3.0 to 6.1)                     | -30.9<br>(-50.6 to -3.9)                                          |
| Guinea-Bissau                      | 48<br>(33 to 63)                          | 4.4<br>(2.8 to 5.5)                     | -38.8<br>(-55.0 to -15.3)                                         |
| Liberia                            | 87<br>(54 to 131)                         | 3.1<br>(1.9 to 4.7)                     | -44.2<br>(-61.2 to -13.3)                                         |
| Mali                               | 775<br>(466 to 1 178)                     | 4.5<br>(2.9 to 7.4)                     | -33.7<br>(-51.4 to -4.0)                                          |
| Mauritania                         | 68<br>(45 to 98)                          | 2.7<br>(1.8 to 3.7)                     | -41.9<br>(-56.1 to -20.8)                                         |

| Location              | Mortality (95% UI)        |                                         |                                                                   |
|-----------------------|---------------------------|-----------------------------------------|-------------------------------------------------------------------|
|                       | 2017 counts               | 2017 age-standardised rates per 100,000 | Percentage change in age-standardised rates between 1990 and 2017 |
| Niger                 | 657<br>(402 to 1 107)     | 4.4<br>(2.8 to 8.8)                     | -39.1<br>(-58.4 to -6.1)                                          |
| Nigeria               | 4 085<br>(2 183 to 5 957) | 2.6<br>(1.6 to 3.5)                     | -34.5<br>(-50.7 to -7.1)                                          |
| Sao Tome and Principe | 1<br>(1 to 2)             | 0.7<br>(0.4 to 1.0)                     | -34.2<br>(-56.6 to -7.1)                                          |
| Senegal               | 372<br>(257 to 563)       | 3.8<br>(2.6 to 5.6)                     | -26.2<br>(-43.3 to -2.4)                                          |
| Sierra Leone          | 217<br>(124 to 295)       | 4.0<br>(2.4 to 5.3)                     | -33.2<br>(-53.3 to -6.4)                                          |
| Togo                  | 134<br>(86 to 179)        | 3.0<br>(1.9 to 3.9)                     | -35.5<br>(-53.1 to -13.1)                                         |
