# Supplementary material for: Epidemiology of injuries from fire, heat and hot substances: global, regional and national morbidity and mortality estimates from the Global Burden of Disease 2017 study
Source: PubMed Central journal article supplement (PMC7571358; doi:10.1136/injuryprev-2019-043299), 2019-12-18
Supplement: injuryprev-2019-043299supp005.pdf [file injuryprev-2019-043299supp005.pdf]

Table 3: YLLs, YLDs, and DALYs for 2017 and percentage change of age-standardised rates between 1990 and 2017 by location for fire, heat, and hot substances

| Location                                                | YLL (95% UI)                          |                                         |                                                                   | YLD (95% UI)                          |                                         |                                                                   | DALY (95% UI)                          |                                         |                                                                   |
|---------------------------------------------------------|---------------------------------------|-----------------------------------------|-------------------------------------------------------------------|---------------------------------------|-----------------------------------------|-------------------------------------------------------------------|----------------------------------------|-----------------------------------------|-------------------------------------------------------------------|
|                                                         | 2017 counts                           | 2017 age-standardised rates per 100,000 | Percentage change in age-standardised rates between 1990 and 2017 | 2017 counts                           | 2017 age-standardised rates per 100,000 | Percentage change in age-standardised rates between 1990 and 2017 | 2017 counts                            | 2017 age-standardised rates per 100,000 | Percentage change in age-standardised rates between 1990 and 2017 |
| <b>Global</b>                                           | 5 286 370<br>(4 308 900 to 6 316 389) | 71<br>(58 to 85)                        | 26.4<br>(-19.3 to 39.3)                                           | 3 177 063<br>(2 187 387 to 4 396 730) | 26.4<br>(18 to 35)                      | 26.4<br>(-19.3 to 39.3)                                           | 8 463 273<br>(7 034 088 to 9 891 059)  | 111<br>(93 to 129)                      | 43.7<br>(34.1 to 53.1)                                            |
| <b>Low SDI</b>                                          | 1 644 066<br>(1 295 331 to 1 950 515) | 71<br>(58 to 85)                        | 26.4<br>(-19.3 to 39.3)                                           | 1 067 067<br>(759 992 to 1 400 725)   | 26.4<br>(18 to 35)                      | 26.4<br>(-19.3 to 39.3)                                           | 2 655 446<br>(2 256 446 to 2 926 710)  | 111<br>(93 to 129)                      | 43.7<br>(34.1 to 53.1)                                            |
| <b>Low-middle SDI</b>                                   | 1 551 209<br>(1 161 636 to 1 934 468) | 91<br>(74 to 108)                       | 49.4<br>(25.0 to 73.8)                                            | 799 992<br>(572 733 to 1 049 107)     | 91<br>(74 to 108)                       | 49.4<br>(25.0 to 73.8)                                            | 2 351 200<br>(1 917 408 to 2 755 950)  | 140<br>(119 to 161)                     | 43.4<br>(34.2 to 52.7)                                            |
| <b>Middle SDI</b>                                       | 947 456<br>(728 789 to 1 083 180)     | 47<br>(36 to 54)                        | -59.4<br>(-64.5 to -54.0)                                         | 536 784<br>(447 751 to 797 623)       | 47<br>(36 to 54)                        | -59.4<br>(-64.5 to -54.0)                                         | 1 484 250<br>(1 164 928 to 1 917 029)  | 53<br>(45 to 61)                        | 53.1<br>(44.0 to 62.2)                                            |
| <b>High-middle SDI</b>                                  | 797 348<br>(733 325 to 850 617)       | 56<br>(51 to 60)                        | -58.7<br>(-61.0 to -56.4)                                         | 555 979<br>(468 872 to 646 819)       | 56<br>(51 to 60)                        | -58.7<br>(-61.0 to -56.4)                                         | 1 393 322<br>(1 136 617 to 1 652 248)  | 90<br>(76 to 108)                       | 53.9<br>(45.8 to 62.0)                                            |
| <b>High SDI</b>                                         | 1 386 742<br>(1 222 246 to 1 548 298) | 76<br>(70 to 82)                        | -45.3<br>(-48.0 to -42.6)                                         | 474 178<br>(282 555 to 653 441)       | 76<br>(70 to 82)                        | -45.3<br>(-48.0 to -42.6)                                         | 812 915<br>(621 270 to 1 000 124)      | 59<br>(46 to 78)                        | 48.4<br>(37.0 to 59.8)                                            |
| <b>Central Europe, Eastern Europe, and Central Asia</b> | 907 349<br>(480 181 to 1 327 592)     | 114<br>(79 to 118)                      | -40.5<br>(-42.9 to -37.1)                                         | 282 527<br>(185 212 to 416 953)       | 114<br>(79 to 118)                      | -40.5<br>(-42.9 to -37.1)                                         | 789 876<br>(688 601 to 923 740)        | 171<br>(150 to 197)                     | -37.6<br>(-40.8 to -34.0)                                         |
| <b>Central Asia</b>                                     | 114 697<br>(103 643 to 128 008)       | 124<br>(112 to 139)                     | -55.4<br>(-60.1 to -50.0)                                         | 75 016<br>(51 732 to 108 990)         | 124<br>(112 to 139)                     | -55.4<br>(-60.1 to -50.0)                                         | 189 713<br>(162 374 to 217 870)        | 206<br>(176 to 241)                     | -43.8<br>(-44.7 to -42.7)                                         |
| <b>Armenia</b>                                          | 1156<br>(1 078 to 1 291)              | 31<br>(26 to 44)                        | -65.0<br>(-83.4 to -47.1)                                         | 2 422<br>(1 557 to 3 558)             | 31<br>(26 to 44)                        | -65.0<br>(-83.4 to -47.1)                                         | 9 161<br>(7 262 to 11 226)             | 108<br>(84 to 136)                      | -73.4<br>(-78.0 to -68.0)                                         |
| <b>Azerbaijan</b>                                       | 20163<br>(14 401 to 31 632)           | 283<br>(154 to 315)                     | -44.7<br>(-62.3 to -27.1)                                         | 9 741<br>(5 582 to 13 825)            | 283<br>(154 to 315)                     | -44.7<br>(-62.3 to -27.1)                                         | 29 705<br>(22 833 to 41 325)           | 292<br>(222 to 400)                     | 45.7<br>(57.9 to 22.2)                                            |
| <b>Georgia</b>                                          | 5932<br>(5 309 to 6 609)              | 149<br>(134 to 160)                     | -49.1<br>(-55.6 to -42.0)                                         | 3 273<br>(2 202 to 4 759)             | 149<br>(134 to 160)                     | -49.1<br>(-55.6 to -42.0)                                         | 9 205<br>(7 850 to 10 753)             | 124<br>(107 to 152)                     | 44.4<br>(42.8 to 46.0)                                            |
| <b>Kazakhstan</b>                                       | 19 622<br>(17 307 to 22 158)          | 105<br>(89 to 119)                      | -10.4<br>(-16.9 to -3.9)                                          | 12 277<br>(8 155 to 17 852)           | 105<br>(89 to 119)                      | -10.4<br>(-16.9 to -3.9)                                          | 31 900<br>(27 037 to 38 042)           | 100<br>(146 to 205)                     | 52.7<br>(60.1 to 45.6)                                            |
| <b>Kyrgyzstan</b>                                       | 4 878<br>(4 379 to 5 511)             | 47<br>(38 to 54)                        | -67.0<br>(-74.0 to -60.0)                                         | 2 473<br>(1 502 to 3 844)             | 47<br>(38 to 54)                        | -67.0<br>(-74.0 to -60.0)                                         | 9 964<br>(8 317 to 11 886)             | 57<br>(43 to 72)                        | 57.9<br>(65.3 to 50.4)                                            |
| <b>Mongolia</b>                                         | 2 930 to 10 811<br>(2 930 to 10 811)  | 85 to 310<br>(85 to 310)                | -61.0 to 31.0<br>(-61.0 to 31.0)                                  | 1 557 to 8 855<br>(1 557 to 8 855)    | 85 to 310<br>(85 to 310)                | -61.0 to 31.0<br>(-61.0 to 31.0)                                  | 10 000 to 14 400<br>(10 000 to 14 400) | 133 to 211<br>(133 to 211)              | 42.9 to 102.1<br>(42.9 to 102.1)                                  |
| <b>Tajikistan</b>                                       | 14 975<br>(10 865 to 21 958)          | 146<br>(117 to 171)                     | -55.4<br>(-62.7 to -48.1)                                         | 9 522<br>(6 227 to 13 833)            | 146<br>(117 to 171)                     | -55.4<br>(-62.7 to -48.1)                                         | 24 498<br>(20 811 to 27 430)           | 260<br>(203 to 319)                     | 49.8<br>(56.6 to 43.0)                                            |
| <b>Turkmenistan</b>                                     | 6 375<br>(5 920 to 7 122)             | 123<br>(106 to 140)                     | -72.0<br>(-78.0 to -66.0)                                         | 4 329<br>(2 889 to 6 034)             | 123<br>(106 to 140)                     | -72.0<br>(-78.0 to -66.0)                                         | 10 704<br>(8 942 to 12 538)            | 210<br>(176 to 247)                     | 50.6<br>(56.3 to 44.9)                                            |
| <b>Uzbekistan</b>                                       | 195 025<br>(131 264 to 40 033)        | 108<br>(86 to 122)                      | -40.4<br>(-46.9 to -33.9)                                         | 108 245<br>(71 035 to 141 415)        | 108<br>(86 to 122)                      | -40.4<br>(-46.9 to -33.9)                                         | 199 649<br>(161 697 to 237 779)        | 189<br>(156 to 227)                     | 51.9<br>(54.8 to 49.0)                                            |
| <b>Central Europe</b>                                   | 47 672<br>(45 413 to 49 745)          | 78<br>(65 to 94)                        | -59.5<br>(-64.8 to -54.6)                                         | 59 781<br>(35 266 to 84 200)          | 78<br>(65 to 94)                        | -59.5<br>(-64.8 to -54.6)                                         | 103 493<br>(82 742 to 131 517)         | 92<br>(74 to 111)                       | 43.0<br>(44.3 to 41.3)                                            |
| <b>Albania</b>                                          | 561<br>(424 to 799)                   | 21<br>(16 to 29)                        | -60.2<br>(-72.4 to -48.0)                                         | 1 232<br>(780 to 1 842)               | 21<br>(16 to 29)                        | -60.2<br>(-72.4 to -48.0)                                         | 1 793<br>(1 288 to 2 408)              | 58<br>(40 to 79)                        | 50.1<br>(60.0 to 35.5)                                            |
| <b>Bosnia and Herzegovina</b>                           | 1 084<br>(901 to 1 313)               | 19<br>(13 to 33)                        | -41.9<br>(-58.3 to -25.4)                                         | 2 778<br>(1 339 to 4 224)             | 19<br>(13 to 33)                        | -41.9<br>(-58.3 to -25.4)                                         | 2 863<br>(2 162 to 3 745)              | 63<br>(52 to 88)                        | 45.6<br>(50.6 to 29.9)                                            |
| <b>Bulgaria</b>                                         | 2 781<br>(2 709 to 2 843)             | 35<br>(34 to 43)                        | -56.0<br>(-61.5 to -50.5)                                         | 4 958<br>(2 095 to 6 752)             | 35<br>(34 to 43)                        | -56.0<br>(-61.5 to -50.5)                                         | 6 338<br>(5 053 to 8 064)              | 63<br>(61 to 93)                        | 43.8<br>(51.3 to 36.3)                                            |
| <b>Croatia</b>                                          | 850<br>(783 to 918)                   | 11<br>(13 to 16)                        | -71.1<br>(-74.1 to -67.9)                                         | 1 840<br>(853 to 2 627)               | 11<br>(13 to 16)                        | -71.1<br>(-74.1 to -67.9)                                         | 2 210<br>(1 693 to 2 883)              | 31<br>(29 to 51)                        | 31.9<br>(57.8 to 46.2)                                            |
| <b>Czech Republic</b>                                   | 2 970<br>(2 650 to 3 207)             | 22<br>(20 to 23)                        | -49.8<br>(-54.8 to -44.8)                                         | 6 259<br>(3 161 to 9 499)             | 22<br>(20 to 23)                        | -49.8<br>(-54.8 to -44.8)                                         | 9 229<br>(6 738 to 11 484)             | 68<br>(51 to 97)                        | 17.8<br>(18.4 to 17.2)                                            |
| <b>Hungary</b>                                          | 2 860 to 3 389<br>(2 860 to 3 389)    | 21 to 26<br>(21 to 26)                  | -72.4 to -69.3<br>(-72.4 to -69.3)                                | 1 661 to 1 986<br>(1 661 to 1 986)    | 21 to 26<br>(21 to 26)                  | -72.4 to -69.3<br>(-72.4 to -69.3)                                | 7 707 to 8 886<br>(7 707 to 8 886)     | 100 to 170<br>(100 to 170)              | 47.7 to 87.0<br>(47.7 to 87.0)                                    |
| <b>Macedonia</b>                                        | 450<br>(328 to 548)                   | 41<br>(35 to 47)                        | -49.0<br>(-63.2 to -34.8)                                         | 885<br>(431 to 1 221)                 | 41<br>(35 to 47)                        | -49.0<br>(-63.2 to -34.8)                                         | 1 435<br>(1 049 to 1 956)              | 37<br>(48 to 77)                        | 57<br>(49.4 to 28.2)                                              |
| <b>Montenegro</b>                                       | 2 488<br>(1 972 to 2 757)             | 29<br>(27 to 40)                        | -62.6<br>(-70.9 to -54.3)                                         | 4 058<br>(1 802 to 6 256)             | 29<br>(27 to 40)                        | -62.6<br>(-70.9 to -54.3)                                         | 6 520<br>(493 to 10 663)               | 60<br>(55 to 69)                        | 42.0<br>(43.4 to 40.4)                                            |
| <b>Poland</b>                                           | 19 024<br>(17 413 to 20 598)          | 40<br>(37 to 45)                        | -47.4<br>(-52.0 to -42.9)                                         | 18 883<br>(11 998 to 24 480)          | 40<br>(37 to 45)                        | -47.4<br>(-52.0 to -42.9)                                         | 33 279<br>(30 562 to 37 500)           | 47<br>(40 to 55)                        | 41.2<br>(48.9 to 33.1)                                            |
| <b>Romania</b>                                          | 12 137<br>(11 279 to 12 950)          | 56<br>(52 to 61)                        | -65.4<br>(-68.9 to -61.9)                                         | 4 298<br>(5 828 to 13 990)            | 56<br>(52 to 61)                        | -65.4<br>(-68.9 to -61.9)                                         | 5 715<br>(4 781 to 6 240)              | 37<br>(29 to 47)                        | 51.4<br>(65.6 to 36.8)                                            |
| <b>Serbia</b>                                           | 2 488<br>(2 119 to 2 922)             | 29<br>(19 to 39)                        | -62.6<br>(-71.4 to -53.8)                                         | 4 058<br>(2 544 to 5 572)             | 29<br>(19 to 39)                        | -62.6<br>(-71.4 to -53.8)                                         | 6 520<br>(4 975 to 8 623)              | 60<br>(45 to 79)                        | 42.0<br>(56.5 to 27.5)                                            |
| <b>Slovakia</b>                                         | 1 499<br>(1 183 to 1 795)             | 22<br>(18 to 30)                        | -49.8<br>(-57.4 to -42.2)                                         | 2 576<br>(1 584 to 3 794)             | 22<br>(18 to 30)                        | -49.8<br>(-57.4 to -42.2)                                         | 3 025<br>(2 076 to 3 853)              | 62<br>(47 to 81)                        | 37.2<br>(47.8 to 28.1)                                            |
| <b>Slovenia</b>                                         | 275<br>(240 to 303)                   | 10<br>(9 to 11)                         | -67.4<br>(-71.2 to -63.2)                                         | 1 127<br>(717 to 1 700)               | 10<br>(9 to 11)                         | -67.4<br>(-71.2 to -63.2)                                         | 1 402<br>(989 to 1 974)                | 12<br>(11 to 13)                        | 21.4<br>(31.4 to 11.9)                                            |
| <b>Eastern Europe</b>                                   | 344 980<br>(314 120 to 345 335)       | 143<br>(130 to 147)                     | -51.5<br>(-53.7 to -49.3)                                         | 143 781<br>(95 832 to 229 673)        | 143<br>(130 to 147)                     | -51.5<br>(-53.7 to -49.3)                                         | 196 110<br>(170 226 to 221 734)        | 100<br>(87 to 126)                      | 23.4<br>(34.4 to 28.7)                                            |
| <b>Belarus</b>                                          | 19 914<br>(18 112 to 21 839)          | 19<br>(15 to 19)                        | -51.5<br>(-57.1 to -45.9)                                         | 15 537<br>(4 690 to 21 396)           | 19<br>(15 to 19)                        | -51.5<br>(-57.1 to -45.9)                                         | 15 537<br>(24 168 to 31 806)           | 40<br>(31 to 41)                        | 23.4<br>(31.2 to 15.4)                                            |
| <b>Estonia</b>                                          | 1 715<br>(1 486 to 1 982)             | 109<br>(82 to 138)                      | -71.7<br>(-76.6 to -66.8)                                         | 1 037<br>(665 to 1 568)               | 109<br>(82 to 138)                      | -71.7<br>(-76.6 to -66.8)                                         | 2 752<br>(2 068 to 3 355)              | 169<br>(140 to 200)                     | 43.4<br>(60.6 to 26.5)                                            |
| <b>Latvia</b>                                           | 1 561<br>(1 322 to 1 802)             | 156<br>(138 to 176)                     | -59.2<br>(-64.3 to -54.1)                                         | 2 396<br>(976 to 3 796)               | 156<br>(138 to 176)                     | -59.2<br>(-64.3 to -54.1)                                         | 3 039<br>(2 456 to 3 621)              | 215<br>(186 to 251)                     | 55.2<br>(60.2 to 49.7)                                            |
| <b>Lithuania</b>                                        | 2 384<br>(2 170 to 2 632)             | 238<br>(140 to 326)                     | -62.8<br>(-68.8 to -56.8)                                         | 1 098<br>(1 320 to 1 390)             | 238<br>(140 to 326)                     | -62.8<br>(-68.8 to -56.8)                                         | 1 492<br>(1 667 to 1 594)              | 124<br>(104 to 155)                     | 42.4<br>(56.1 to 44.9)                                            |
| <b>Moldova</b>                                          | 2 488<br>(1 573 to 3 159)             | 29<br>(16 to 50)                        | -62.6<br>(-68.8 to -56.4)                                         | 4 058<br>(1 984 to 6 256)             | 29<br>(16 to 50)                        | -62.6<br>(-68.8 to -56.4)                                         | 6 520<br>(5 811 to 8 127)              | 60<br>(45 to 79)                        | 42.0<br>(60.6 to 49.6)                                            |
| <b>Russian Federation</b>                               | 245 156<br>(226 789 to 252 068)       | 145<br>(132 to 158)                     | -28.3<br>(-31.2 to -25.1)                                         | 103 954<br>(55 629 to 172 020)        | 145<br>(132 to 158)                     | -28.3<br>(-31.2 to -25.1)                                         | 149 110<br>(107 161 to 198 059)        | 201<br>(180 to 228)                     | 29.7<br>(35.8 to 23.8)                                            |
| <b>Ukraine</b>                                          | 68 310<br>(63 520 to 73 280)          | 31<br>(26 to 38)                        | -32.1<br>(-33.1 to -31.1)                                         | 1 127<br>(2 494 to 3 008)             | 31<br>(26 to 38)                        | -32.1<br>(-33.1 to -31.1)                                         | 1 402<br>(8 316 to 11 844)             | 55<br>(49 to 62)                        | 30.6<br>(38.2 to 22.8)                                            |
| <b>High-income</b>                                      | 3 388 627<br>(3 141 450 to 3 613 151) | 40.4<br>(38 to 43)                      | -60.4<br>(-61.7 to -59.1)                                         | 434 243<br>(261 405 to 659 517)       | 40.4<br>(38 to 43)                      | -60.4<br>(-61.7 to -59.1)                                         | 772 669<br>(578 840 to 1 020 033)      | 64<br>(48 to 79)                        | 45.4<br>(50.2 to 40.5)                                            |
| <b>Australia</b>                                        | 4 260<br>(3 917 to 4 631)             | 42<br>(37 to 47)                        | -44.3<br>(-46.0 to -42.6)                                         | 44.3<br>(44.4 to 20 764)              | 42<br>(37 to 47)                        | -44.3<br>(-46.0 to -42.6)                                         | 52<br>(2 954 to 25 173)                | 57<br>(41 to 78)                        | 28.1<br>(37.6 to 21.9)                                            |
| <b>Australia</b>                                        | 3539<br>(3 122 to 3 898)              | 14<br>(12 to 15)                        | -61.1<br>(-65.0 to -57.0)                                         | 11 060<br>(6 846 to 16 674)           | 14<br>(12 to 15)                        | -61.1<br>(-65.0 to -57.0)                                         | 14 599<br>(9 519 to 21 216)            | 54<br>(43 to 73)                        | 26.8<br>(33.9 to 19.8)                                            |
| <b>New Zealand</b>                                      | 730<br>(684 to 781)                   | 17<br>(16 to 19)                        | -67.6<br>(-70.9 to -64.1)                                         | 2 701<br>(1 702 to 4 094)             | 17<br>(16 to 19)                        | -67.6<br>(-70.9 to -64.1)                                         | 5.2<br>(2 431 to 8 224)                | 72<br>(52 to 100)                       | 35.4<br>(41.2 to 27.6)                                            |
| <b>High-income Asia-Pacific</b>                         | 50 887<br>(48 561 to 52 976)          | 50<br>(45 to 57)                        | -44.5<br>(-46.5 to -42.5)                                         | 112 460<br>(66 291 to 181 445)        | 50<br>(45 to 57)                        | -44.5<br>(-46.5 to -42.5)                                         | 148 647<br>(116 892 to 233 007)        | 45<br>(48 to 93)                        | 46<br>(44.4 to 28.2)                                              |
| <b>Brunei</b>                                           | 208<br>(208 to 309)                   | 51<br>(51 to 73)                        | -47.4<br>(-56.7 to -37.5)                                         | 1 176<br>(110 to 267)                 | 51<br>(51 to 73)                        | -47.4<br>(-56.7 to -37.5)                                         | 1 176<br>(534 to 1 539)                | 44<br>(39 to 123)                       | 45.7<br>(51.3 to 37.4)                                            |
| <b>Japan</b>                                            | 35 261<br>(23 802 to 36 675)          | 20<br>(19 to 21)                        | -48.9<br>(-52.4 to -45.3)                                         | 85 672<br>(49 291 to 140 743)         | 20<br>(19 to 21)                        | -48.9<br>(-52.4 to -45.3)                                         | 120 934<br>(84 506 to 176 462)         | 69<br>(68 to 99)                        | 12.0<br>(13.0 to 11.0)                                            |
| <b>South Korea</b>                                      | 15 087<br>(13 800 to 16 243)          | 25<br>(23 to 27)                        | -77.8<br>(-78.9 to -76.6)                                         | 24 118<br>(14 992 to 36 475)          | 25<br>(23 to 27)                        | -77.8<br>(-78.9 to -76.6)                                         | 39 205<br>(24 160 to 52 759)           | 67<br>(49 to 81)                        | 65.7<br>(74.0 to 60.0)                                            |
| <b>Singapore</b>                                        | 973<br>(811 to 1 099)                 | 73<br>(63 to 82)                        | -47.4<br>(-51.5 to -43.3)                                         | 1 694<br>(1 677 to 1 699)             | 73<br>(63 to 82)                        | -47.4<br>(-51.5 to -43.3)                                         | 1 907<br>(2 071 to 1 419)              | 41<br>(33 to 69)                        | 45.7<br>(50.2 to 41.2)                                            |
| <b>High-income North America</b>                        | 1 465 700<br>(1 370 to 1 591)         | 41<br>(38 to 43)                        | -43.1<br>(-45.8 to -40.4)                                         | 77 214<br>(77 214 to 217 264)         | 41<br>(38 to 43)                        | -43.1<br>(-45.8 to -40.4)                                         | 95.6<br>(27 246 to 314 353)            | 67<br>(57 to 87)                        | 45.8<br>(56.9 to 34.4)                                            |
| <b>Canada</b>                                           | 11 270<br>(10 517 to 12 159)          | 30<br>(28 to 31)                        | -62.9<br>(-64.8 to -61.0)                                         | 15 538<br>(6 408 to 23 672)           | 30<br>(28 to 31)                        | -62.9<br>(-64.8 to -61.0)                                         | 26 808<br>(21 219 to 34 978)           | 64<br>(51 to 82)                        | 45.8<br>(51.9 to 39.3)                                            |
| <b>Greenland</b>                                        | 92<br>(70 to 116)                     | 180<br>(145 to 238)                     | -18.0<br>(-21.3 to -14.7)                                         | 29<br>(20 to 41)                      | 180<br>(145 to 238)                     | -18.0<br>(-21.3 to -14.7)                                         | 121<br>(102 to 147)                    | 121<br>(186 to 282)                     | 64.3<br>(72.3 to 48.9)                                            |
| <b>USA</b>                                              | 1 391 181<br>(135 267 to 141 215)     | 139<br>(139 to 142)                     | -61.1<br>(-63.9 to -58.3)                                         | 1 309<br>(681 to 1 933 364)           |                                         |                                                                   |                                        |                                         |                                                                   |

| Location                         | YLLs (95% UI)                          |                                         |                                                                   | YLDs (95% UI)                          |                                         |                                                                   | DALYs (95% UI)                             |                                         |                                                                   |
|----------------------------------|----------------------------------------|-----------------------------------------|-------------------------------------------------------------------|----------------------------------------|-----------------------------------------|-------------------------------------------------------------------|--------------------------------------------|-----------------------------------------|-------------------------------------------------------------------|
|                                  | 2017 counts                            | 2017 age-standardized rates per 100,000 | Percentage change in age-standardized rates between 1990 and 2017 | 2017 counts                            | 2017 age-standardized rates per 100,000 | Percentage change in age-standardized rates between 1990 and 2017 | 2017 counts                                | 2017 age-standardized rates per 100,000 | Percentage change in age-standardized rates between 1990 and 2017 |
| United Kingdom                   | 13 127<br>(12 856 to 13 385)           | 17<br>(17 to 17)                        | 64.7<br>(46.0 to 63.5)                                            | 21 955<br>(13 818 to 31 442)           | 28<br>(17 to 42)                        | 1.1<br>(0.8 to 1.3)                                               | 35 081<br>(26 861 to 46 636)               | 45<br>(34 to 59)                        | 40.9<br>(47.6 to 38.2)                                            |
| Latin America and Caribbean      | 216 988<br>(205 860 to 230 545)        | 38<br>(36 to 41)                        | 48.8<br>(71.1 to 45.0)                                            | 145 011<br>(96 811 to 209 798)         | 24<br>(16 to 35)                        | 42.0<br>(47.6 to 36.9)                                            | 83<br>(31 260 to 427 855)                  | 24<br>(64 to 74)                        | 62.1<br>(45.5 to 57.9)                                            |
| Andean Latin America             | 33 467<br>(27 474 to 49 311)           | 45<br>(45 to 71)                        | 48.7<br>(25.9 to 59.4)                                            | 24 544<br>(14 235 to 28 025)           | 24<br>(24 to 47)                        | 54.5<br>(58.9 to 42.0)                                            | 54<br>(44 963 to 66 662)                   | 24<br>(74 to 109)                       | 62.1<br>(70.4 to 50.1)                                            |
| Bolivia                          | 8805<br>(5 690 to 12 563)              | 75<br>(51 to 102)                       | -7.6<br>(42.3 to 45.8)                                            | 4 934<br>(2 486 to 5 586)              | 42<br>(21 to 60)                        | 47.5<br>(53.0 to 41.0)                                            | 13 739<br>(10 217 to 17 958)               | 120<br>(70 to 151)                      | 66.6<br>(73.5 to 48.3)                                            |
| Ecuador                          | 8 745<br>(7 726 to 9 922)              | 61.4<br>(48 to 61)                      | 5.0<br>(46.8 to 55.3)                                             | 5 890<br>(3 718 to 7 416)              | 33<br>(23 to 45)                        | 52.4<br>(61.7 to 46.6)                                            | 14 135<br>(12 124 to 16 474)               | 33<br>(25 to 101)                       | 59.0<br>(43.4 to 53.9)                                            |
| Peru                             | 15 779<br>(11 117 to 23 951)           | 47<br>(31 to 69)                        | 40.9<br>(40.1 to 46.7)                                            | 10 133<br>(6 880 to 14 187)            | 31<br>(21 to 43)                        | 92.4<br>(61.0 to 41.4)                                            | 25 912<br>(20 344 to 34 676)               | 78<br>(61 to 103)                       | 64.7<br>(73.6 to 47.6)                                            |
| Caribbean                        | 38 005<br>(22 276 to 61 882)           | 89<br>(59 to 103)                       | 48.9<br>(71.2 to 46.1)                                            | 23 544<br>(11 246 to 34 348)           | 24<br>(17 to 44)                        | 24.1<br>(30.2 to 17.3)                                            | 55 518<br>(42 411 to 68 092)               | 124<br>(82 to 154)                      | 57.9<br>(42.6 to 61.2)                                            |
| Antigua and Barbuda              | 59<br>(31 to 67)                       | 72<br>(62 to 85)                        | -56.1<br>(43.3 to 47.3)                                           | 31<br>(21 to 45)                       | 31<br>(27 to 37)                        | 44.8<br>(52.0 to 36.8)                                            | 90<br>(80 to 124)                          | 104<br>(100 to 114)                     | 53.2<br>(59.4 to 46.1)                                            |
| The Bahamas                      | 343<br>(307 to 379)                    | 55<br>(48 to 106)                       | -56.9<br>(43.4 to 50.3)                                           | 141<br>(95 to 201)                     | 32<br>(24 to 50)                        | 42.6<br>(48.9 to 36.6)                                            | 483<br>(423 to 552)                        | 130<br>(114 to 149)                     | 53.8<br>(59.2 to 48.3)                                            |
| Barbados                         | 125<br>(114 to 137)                    | 125<br>(136 to 144)                     | -60.5<br>(65.4 to 55.0)                                           | 107<br>(70 to 157)                     | 32<br>(21 to 46)                        | 30.7<br>(33.8 to 13.6)                                            | 73<br>(58 to 283)                          | 71<br>(60 to 86)                        | 45.9<br>(55.5 to 41.6)                                            |
| Belize                           | 139<br>(174 to 223)                    | 59<br>(47 to 59)                        | -42.9<br>(48.1 to 55.6)                                           | 184<br>(127 to 248)                    | 48<br>(33 to 64)                        | 39.8<br>(26.7 to 12.5)                                            | 281<br>(331 to 448)                        | 180<br>(85 to 138)                      | 45.0<br>(55.6 to 43.2)                                            |
| Bermuda                          | 5<br>(5 to 6)                          | 7<br>(6 to 8)                           | -71.4<br>(75.6 to 66.7)                                           | 27<br>(17 to 40)                       | 33<br>(21 to 50)                        | -1.5<br>(15.0 to 12.3)                                            | 33<br>(22 to 46)                           | 40<br>(28 to 57)                        | 31.6<br>(43.3 to 28.6)                                            |
| Cuba                             | 2405<br>(2 164 to 2 680)               | 19<br>(17 to 21)                        | -11.5<br>(83.5 to 79.2)                                           | 4 091<br>(2 593 to 6 213)              | 31<br>(19 to 46)                        | -16.8<br>(28.8 to 4.6)                                            | 6 495<br>(4 964 to 8 553)                  | 41<br>(38 to 65)                        | 44.3<br>(70.1 to 57.1)                                            |
| Dominica                         | 545<br>(45 to 58)                      | 51<br>(70 to 96)                        | 37.1<br>(47.2 to 24.3)                                            | 145<br>(12 to 42)                      | 31<br>(28 to 56)                        | 22.1<br>(20 to 13)                                                | 81<br>(70 to 93)                           | 41<br>(105 to 142)                      | 43.3<br>(40.9 to 23.2)                                            |
| Dominican Republic               | 5481<br>(4 207 to 7 331)               | 51<br>(41 to 72)                        | 37.1<br>(46.8 to 36.5)                                            | 145<br>(2 800 to 8 802)                | 31<br>(27 to 50)                        | 22.1<br>(54.9 to 34.9)                                            | 81<br>(8 081 to 11 995)                    | 41<br>(79 to 116)                       | 43.3<br>(42.6 to 40.4)                                            |
| Grenada                          | 80<br>(62 to 89)                       | 70<br>(52 to 89)                        | 64.4<br>(49.7 to 57.7)                                            | 54<br>(38 to 76)                       | 47<br>(31 to 64)                        | 36.4<br>(42.7 to 30.4)                                            | 135<br>(116 to 155)                        | 116<br>(141 to 141)                     | 56.7<br>(43.8 to 51.4)                                            |
| Guyana                           | 581<br>(50 to 662)                     | 51<br>(21 to 92)                        | 46.8<br>(43.2 to 49.3)                                            | 392<br>(272 to 516)                    | 52<br>(36 to 69)                        | 27.8<br>(34.2 to 21.4)                                            | 973<br>(812 to 1 311)                      | 133<br>(114 to 155)                     | 61.7<br>(47.2 to 47.5)                                            |
| Haiti                            | 18 026<br>(9 236 to 28 759)            | 153<br>(79 to 228)                      | 47.0<br>(79.3 to 40.5)                                            | 11 952<br>(6 222 to 11 881)            | 77<br>(54 to 103)                       | 49.2<br>(43.0 to 33.9)                                            | 27 718<br>(17 553 to 38 246)               | 217<br>(151 to 309)                     | 23.0<br>(73.4 to 39.9)                                            |
| Jamaica                          | 1 068<br>(852 to 1 367)                | 20<br>(11 to 43)                        | -18.4<br>(14.2 to 20.0)                                           | 1 290<br>(862 to 1 744)                | 40<br>(30 to 60)                        | -3.0<br>(20.8 to 0.2)                                             | 2 255<br>(1 842 to 2 755)                  | 80<br>(65 to 102)                       | 14.4<br>(12.6 to 46)                                              |
| Puerto Rico                      | 864<br>(804 to 932)                    | 20<br>(19 to 22)                        | -67.7<br>(46.6 to 48.3)                                           | 1 267<br>(793 to 1 936)                | 29<br>(19 to 45)                        | 14.0<br>(7.0 to 14.0)                                             | 2 131<br>(1 664 to 2 774)                  | 39<br>(30 to 47)                        | 39.9<br>(48.0 to 30.7)                                            |
| Saint Lucia                      | 78<br>(65 to 104)                      | 78<br>(47 to 58)                        | -55.2<br>(71.3 to 62.0)                                           | 76<br>(51 to 107)                      | 39<br>(27 to 56)                        | 39.5<br>(46.9 to 32.0)                                            | 116<br>(144 to 202)                        | 50<br>(78 to 108)                       | 30.0<br>(43.4 to 54.4)                                            |
| Saint Vincent and the Grenadines | 71<br>(71 to 85)                       | 71<br>(62 to 76)                        | -45.2<br>(61.4 to 48.7)                                           | 76<br>(58 to 74)                       | 32<br>(21 to 43)                        | 32.1<br>(29.3 to 15.9)                                            | 134<br>(115 to 153)                        | 114<br>(99 to 131)                      | 114<br>(50.8 to 40.0)                                             |
| Suriname                         | 388<br>(348 to 434)                    | 71<br>(63 to 79)                        | 44.2<br>(49.4 to 57.9)                                            | 388<br>(204 to 386)                    | 37<br>(34 to 65)                        | 35.6<br>(41.9 to 29.7)                                            | 676<br>(579 to 927)                        | 111<br>(103 to 139)                     | 58.3<br>(41.3 to 50.9)                                            |
| Trinidad and Tobago              | 828<br>(62 to 978)                     | 65<br>(54 to 78)                        | -43.0<br>(53.8 to 30.7)                                           | 539<br>(370 to 709)                    | 35<br>(24 to 50)                        | 30.4<br>(38.8 to 20.9)                                            | 1 384<br>(1 114 to 1 625)                  | 39.1<br>(80 to 159)                     | 39.1<br>(47.1 to 29.8)                                            |
| Virgin Islands                   | 19<br>(19 to 51)                       | 45<br>(12 to 47)                        | 17.7<br>(43.2 to 50.8)                                            | 30<br>(19 to 45)                       | 30<br>(19 to 45)                        | 31.1<br>(45.4 to 20.0)                                            | 81<br>(66 to 100)                          | 41<br>(50 to 81)                        | 30.6<br>(45.5 to 41.7)                                            |
| Central Latin America            | 88 328<br>(79 589 to 87 179)           | 33<br>(32 to 35)                        | -47.8<br>(49.9 to 45.8)                                           | 47 247<br>(41 143 to 51 671)           | 24<br>(16 to 36)                        | -44.2<br>(56.6 to 38.0)                                           | 145 944<br>(123 766 to 175 650)            | 24<br>(49 to 69)                        | 48<br>(44.2 to 57.1)                                              |
| Colombia                         | 930<br>(806 to 10 753)                 | 11<br>(12 to 22)                        | 61.4<br>(41.1 to 78.2)                                            | 12 410<br>(8 190 to 18 138)            | 24<br>(16 to 35)                        | 59.0<br>(66.1 to 50.5)                                            | 21 741<br>(17 077 to 27 465)               | 11<br>(14 to 55)                        | 11.3<br>(47.4 to 48.8)                                            |
| Costa Rica                       | 1 028<br>(916 to 1 229)                | 22<br>(20 to 24)                        | -41.1<br>(48.5 to 38.0)                                           | 1 030<br>(632 to 1 370)                | 21<br>(15 to 22)                        | 32.5<br>(43.7 to 20.4)                                            | 2 098<br>(1 660 to 2 622)                  | 4<br>(15 to 55)                         | 37.2<br>(48.0 to 30.1)                                            |
| El Salvador                      | 1 949<br>(1 353 to 2 737)              | 21<br>(23 to 46)                        | 11.2<br>(41.8 to 48.9)                                            | 1 586<br>(1 070 to 2 289)              | 16<br>(17 to 37)                        | 13.6<br>(47.9 to 52.6)                                            | 3 445<br>(2 683 to 4 423)                  | 26<br>(44 to 73)                        | 25.7<br>(75.7 to 53.7)                                            |
| Guatemala                        | 12 667<br>(10 837 to 14 289)           | 76<br>(67 to 86)                        | -49.4<br>(46.1 to 41.7)                                           | 6 574<br>(4 563 to 8 959)              | 40<br>(28 to 55)                        | 40.4<br>(54.6 to 42.0)                                            | 18 642<br>(14 188 to 21 699)               | 116<br>(100 to 132)                     | 116<br>(140 to 45.7)                                              |
| Honduras                         | 2 090<br>(1 589 to 3 019)              | 23<br>(18 to 48)                        | 64.4<br>(72.4 to 48.0)                                            | 1 684<br>(1 241 to 2 294)              | 28<br>(20 to 48)                        | 22.7<br>(30.5 to 13.6)                                            | 6 774<br>(5 271 to 8 652)                  | 71<br>(57 to 93)                        | 43.2<br>(72.9 to 83)                                              |
| Mexico                           | 45 070<br>(41 842 to 46 596)           | 67<br>(64 to 99)                        | 68.0<br>(68.5 to 66.5)                                            | 24 266<br>(14 430 to 21 212)           | 39<br>(11 to 81)                        | 39.7<br>(43.8 to 36.4)                                            | 69 336<br>(59 036 to 84 297)               | 56<br>(48 to 88)                        | 61.8<br>(45.1 to 58.3)                                            |
| Nicaragua                        | 1 000<br>(804 to 1 660)                | 10<br>(13 to 27)                        | 17.6<br>(68.4 to 52.4)                                            | 1 000<br>(1 344 to 1 712)              | 11<br>(2 to 44)                         | 41.1<br>(50.2 to 32.0)                                            | 1 900<br>(2 285 to 3 919)                  | 31<br>(37 to 63)                        | 25.7<br>(72.1 to 45.5)                                            |
| Panama                           | 937<br>(811 to 1 071)                  | 937<br>(21 to 28)                       | -46.3<br>(54.3 to 38.4)                                           | 937<br>(832 to 1 401)                  | 34<br>(16 to 35)                        | 38.4<br>(48.2 to 26.1)                                            | 1 885<br>(1 546 to 2 333)                  | 34<br>(40 to 59)                        | 48<br>(49.2 to 38.6)                                              |
| Venezuela                        | 957<br>(8 213 to 11 173)               | 32<br>(21 to 32)                        | -73.3<br>(41.6 to 46.9)                                           | 38 784<br>(25 784 to 51 811)           | 17<br>(15 to 41)                        | 41.5<br>(48.7 to 27.8)                                            | 105 989<br>(51 212 to 22 833)              | 47<br>(103 to 243)                      | 67.2<br>(40.5 to 51.5)                                            |
| Tropical Latin America           | 64 762 to 69 763<br>(54 748 to 74 748) | 30 to 33<br>(21 to 47)                  | -71.5 to -71.5<br>(72.1 to 71.5)                                  | 22 821 to 22 826<br>(13 746 to 31 442) | 16 to 26<br>(10 to 16)                  | -39.4 to -39.4<br>(44.3 to 20.9)                                  | 60 190 to 128 110<br>(40 190 to 128 110)   | 42 to 58<br>(15 to 11)                  | 58 to 68<br>(70.0 to 64.2)                                        |
| Brazil                           | 147 744<br>(62 492 to 67 338)          | 51<br>(30 to 33)                        | -47.8<br>(75.5 to 71.9)                                           | 83 257<br>(21 466 to 58 734)           | 24<br>(9 to 26)                         | -44.2<br>(44.8 to 39.7)                                           | 145 944<br>(86 335 to 133 577)             | 47<br>(41 to 57)                        | 48.5<br>(70.6 to 64.8)                                            |
| Paraguay                         | 1 903 to 4 788<br>(566 to 1 460)       | 29 to 51<br>(51 to 111)                 | 46.3<br>(43.0 to 36.5)                                            | 2 683 to 32 820<br>(1 866 to 27 820)   | 37 to 65<br>(32 to 65)                  | 49.6<br>(56.7 to 41.0)                                            | 3 949 to 107 453<br>(628 426 to 1 007 453) | 47<br>(105 to 168)                      | 45.5<br>(48.8 to 51.5)                                            |
| North Africa and Middle East     | 566 160<br>(395 766 to 682 033)        | 63<br>(52 to 62)                        | 64.3<br>(70.5 to 52.9)                                            | 2 683 93<br>(1 866 872 to 3 728 830)   | 46<br>(32 to 65)                        | 49.6<br>(56.7 to 41.0)                                            | 834 993<br>(628 426 to 1 007 453)          | 139<br>(105 to 168)                     | 60.4<br>(48.8 to 51.5)                                            |
| Algeria                          | 30 068<br>(23 116 to 39 043)           | 60<br>(72 to 113)                       | 60.8<br>(66.5 to 51.6)                                            | 23 303<br>(4 430 to 59 597)            | 9<br>(6 to 10)                          | 9.3<br>(8.1 to 16.5)                                              | 133 840<br>(63 011 to 165 008)             | 125<br>(143 to 209)                     | 125<br>(49.8 to 13.8)                                             |
| Bahrain                          | 460<br>(333 to 721)                    | 25<br>(25 to 0)                         | -42.3<br>(61.8 to 31.3)                                           | 472<br>(434 to 888)                    | 32<br>(21 to 52)                        | 34.2<br>(47.2 to 18.9)                                            | 794<br>(860 to 1 505)                      | 31<br>(17 to 94)                        | 31.3<br>(51.6 to 14.4)                                            |
| Egypt                            | 112 863<br>(79 788 to 151 644)         | 113<br>(78 to 149)                      | -51.1<br>(42.8 to 33.8)                                           | 43 833<br>(30 953 to 72 929)           | 34<br>(24 to 47)                        | 53.8<br>(60.9 to 45.5)                                            | 156 697<br>(116 905 to 198 848)            | 162<br>(121 to 201)                     | 52.0<br>(40.8 to 40.4)                                            |
| Iran                             | 37 234<br>(30 346 to 106 671)          | 61<br>(99 to 132)                       | 61.3<br>(79.5 to 57.2)                                            | 19 566<br>(21 471 to 48 584)           | 47<br>(25 to 56)                        | 54<br>(73.3 to 58.9)                                              | 81<br>(107 993 to 149 979)                 | 47<br>(130 to 182)                      | 136<br>(77.8 to 58.7)                                             |
| Iraq                             | 26 369<br>(21 189 to 31 985)           | 66<br>(46 to 87)                        | -49.7<br>(81.7 to 36.0)                                           | 24 850<br>(12 427 to 37 674)           | 46<br>(24 to 34)                        | 56.6<br>(42.7 to 14.4)                                            | 66<br>(42 718 to 63 351)                   | 46<br>(27 to 87)                        | 51.3<br>(49.3 to 47.9)                                            |
| Jordan                           | 7521<br>(5 882 to 9 886)               | 69<br>(65 to 85)                        | 69.5<br>(72.9 to 69.6)                                            | 3 400<br>(2 192 to 5 932)              | 36<br>(21 to 52)                        | 36<br>(61.5 to 62.7)                                              | 10 921<br>(8 150 to 12 421)                | 105<br>(85 to 128)                      | 62.1<br>(40.9 to 28.8)                                            |
| Kuwait                           | 1545<br>(1 063 to 1 673)               | 46<br>(32 to 39)                        | -46.3<br>(49.5 to 39.3)                                           | 1 725<br>(1 079 to 2 594)              | 37<br>(23 to 56)                        | 11.3<br>(21.2 to 2.2)                                             | 2 340<br>(2 612 to 1 122)                  | 37<br>(39 to 91)                        | 32.7<br>(40.1 to 26.7)                                            |
| Lebanon                          | 5463<br>(2 613 to 10 237)              | 54<br>(80 to 115)                       | 74.0<br>(60.9 to 47.7)                                            | 2 827<br>(1 773 to 2 283)              | 25<br>(21 to 54)                        | 52.5<br>(42.7 to 41.7)                                            | 8 995<br>(5 072 to 11 025)                 | 52<br>(60 to 151)                       | 25.7<br>(46.0 to 40.3)                                            |
| Libya                            | 671<br>(2 115 to 10 231)               | 671<br>(10 to 13)                       | -45.9<br>(48.7 to 23.5)                                           | 368<br>(1 558 to 1 469)                | 39<br>(22 to 51)                        | 368<br>(61.8 to 43.2)                                             | 9 019<br>(4 493 to 13 256)                 | 129<br>(65 to 188)                      | 48.1<br>(44.1 to 35.0)                                            |
| Morocco                          | 41 300<br>(20 778 to 99 951)           | 117<br>(65 to 128)                      | -59.8<br>(49.3 to 44.9)                                           | 17 932<br>(12 309 to 24 232)           | 49<br>(34 to 66)                        | 53.2<br>(59.3 to 46.5)                                            | 186<br>(17 010 to 79 804)                  | 166<br>(103 to 212)                     | 58.0<br>(40.9 to 47.8)                                            |
| Palestine                        | 1 159<br>(913 to 409)                  | 69<br>(20 to 47)                        | 69.7<br>(41.5 to 48.0)                                            | 2 688<br>(1 873 to 3 614)              | 65<br>(45 to 88)                        | 12.7<br>(18.7 to 21.5)                                            | 4 047<br>(3 982 to 5 329)                  | 93<br>(80 to 122)                       | 38.2<br>(51.2 to 18.9)                                            |
| Oman                             | 880<br>(2 114 to 3 353)                | 880<br>(16 to 29)                       | 43.4<br>(73.2 to 32.3)                                            | 1 490<br>(4 936 to 2 226)              | 31<br>(20 to 49)                        | 49.0<br>(47.3 to 15.9)                                            | 2 170<br>(1 708 to 2 237)                  | 31<br>(41 to 72)                        | 21.0<br>(40.7 to 31.2)                                            |
| Qatar                            | 1 041<br>(688 to 1 525)                | 38<br>(26 to 53)                        | -56.2<br>(72.8 to 27.5)                                           | 1 041<br>(640 to 1 554)                | 35<br>(21 to 52)                        | 34.2<br>(46.7 to 21.2)                                            | 2 491<br>(1 532 to 3 283)                  | 48<br>(51 to 96)                        | 48<br>(41.9 to 30.4)                                              |
| Saudi Arabia                     | 34 677<br>(26 228 to 46 261)           | 97<br>(51 to 128)                       | -61.1<br>(71.9 to 24.1)                                           | 11 553<br>(7 309 to 12 477)            | 33<br>(21 to 50)                        | 64.8<br>(72.8 to 56.6)                                            | 46 229<br>(36 646 to 58 414)               | 130<br>(104 to 169)                     | 65.0<br>(110.6 to 44.4)                                           |
| Sudan                            | 71 376<br>(29 484 to 115 093)          | 158<br>(88 to 248)                      | -67.8<br>(78.0 to 37.0)                                           | 15 677<br>(7 266 to 18 347)            | 31<br>(21 to 60)                        | 28.7<br>(32.6 to 25.2)                                            | 83 053<br>(40 881 to 128 000)              | 196<br>(105 to 287)                     | 43.9<br>(15.4 to 35.3)                                            |
| Syria                            | 876<br>(418 to 8 886)                  | 20<br>(30 to 52)                        | -71.4<br>(61.4 to 55.0)                                           | 7 387<br>(4 936 to 10 453)             | 49<br>(29 to 62)                        | 35.3<br>(47.1 to 22.5)                                            | 14 054<br>(10 981 to 17 653)               | 48<br>(65 to 105)                       | 25.7<br>(70.3 to 46.7)                                            |
| Tunisia                          | 678<br>(3 39 to 12 158)                | 678<br>(27 to 109)                      | -48.9<br>(77.2 to 53.1)                                           | 1 026<br>(1 316 to 1 627)              | 39<br>(23 to 56)                        | 55.6<br>(64.0 to 45.7)                                            | 11 604<br>(7 276 to 17 274)                | 38<br>(61 to 132)                       | 48.1<br>(72.5 to 53.1)                                            |

| Location                           | YLLs (95% UI)                      |                                         |                                                                   | YLDs (95% UI)                   |                                         |                                                                   | DALYs (95% UI)                        |                                         |                                                                   |
|------------------------------------|------------------------------------|-----------------------------------------|-------------------------------------------------------------------|---------------------------------|-----------------------------------------|-------------------------------------------------------------------|---------------------------------------|-----------------------------------------|-------------------------------------------------------------------|
|                                    | 2017 counts                        | 2017 age-standardized rates per 100,000 | Percentage change in age-standardized rates between 1990 and 2017 | 2017 counts                     | 2017 age-standardized rates per 100,000 | Percentage change in age-standardized rates between 1990 and 2017 | 2017 counts                           | 2017 age-standardized rates per 100,000 | Percentage change in age-standardized rates between 1990 and 2017 |
| Marshall Islands                   | 54<br>(16 to 93)                   | 97<br>(61 to 131)                       | -15.5<br>(-46.1 to 12.3)                                          | 22<br>(16 to 29)                | 20<br>(15 to 22)                        | -3.4<br>(-10.9 to 4.7)                                            | 76<br>(55 to 95)                      | 137<br>(101 to 171)                     | -15.4<br>(-36.1 to 11.1)                                          |
| Northern Mariana Islands           | 19<br>(14 to 20)                   | 19<br>(13 to 48)                        | -43.8<br>(-71.1 to -21.5)                                         | 11<br>(7 to 17)                 | 11<br>(4 to 32)                         | -21.6<br>(-32.9 to -11.4)                                         | 21<br>(2 to 33)                       | 21<br>(49 to 21)                        | -43.8<br>(-69.1 to -21.3)                                         |
| Papua New Guinea                   | 15 865<br>(8 159 to 22 599)        | 15 865<br>(8 510 to 22 599)             | -36.3<br>(-42.7 to -0.3)                                          | 46<br>(27 to 65)                | 46<br>(31 to 60)                        | -4.5<br>(-12.3 to 1.2)                                            | 46<br>(25 033 to 26 044)              | 46<br>(129 to 271)                      | -36.3<br>(-42.7 to -0.3)                                          |
| Samoa                              | 119<br>(6 to 100)                  | 61<br>(40 to 98)                        | -28.0<br>(-47.1 to -0.0)                                          | 79<br>(56 to 102)               | 79<br>(52 to 107)                       | -5.3<br>(-12.4 to 1.7)                                            | 198<br>(146 to 278)                   | 106<br>(79 to 147)                      | -20.0<br>(-34.0 to -6.6)                                          |
| Solomon Islands                    | 705<br>(513 to 947)                | 109<br>(81 to 149)                      | -27.4<br>(-46.5 to -0.8)                                          | 297<br>(208 to 388)             | 297<br>(186 to 406)                     | -5.1<br>(-24.2 to 11.0)                                           | 1 002<br>(800 to 1 261)               | 204<br>(129 to 204)                     | -18.6<br>(-35.4 to 1.4)                                           |
| Tonga                              | 156<br>(119 to 198)                | 153<br>(117 to 194)                     | -2.8<br>(-13.7 to 8.8)                                            | 49<br>(35 to 64)                | 49<br>(37 to 67)                        | -3.7<br>(-24.6 to -10.1)                                          | 204<br>(166 to 250)                   | 204<br>(167 to 248)                     | -2.8<br>(-13.7 to 8.8)                                            |
| Vanuatu                            | 299<br>(183 to 427)                | 101<br>(63 to 145)                      | -6.7<br>(-43.0 to 22.5)                                           | 143<br>(101 to 185)             | 143<br>(91 to 211)                      | -7.1<br>(0.1 to 13.8)                                             | 439<br>(315 to 574)                   | 150<br>(115 to 201)                     | -7.1<br>(-30.1 to 16.9)                                           |
| <b>Southeast Asia</b>              | <b>227 102 to 285 189</b>          | <b>42</b>                               | <b>-54.2</b>                                                      | <b>64 513</b>                   | <b>9</b>                                | <b>-44.0</b>                                                      | <b>122 950</b>                        | <b>51</b>                               | <b>-52.7</b>                                                      |
| Cambodia                           | 11 857<br>(8 34 to 16 413)         | 15<br>(10 to 13)                        | -47.8<br>(-78.4 to -41.0)                                         | 2 871<br>(2 029 to 3 790)       | 13<br>(13 to 24)                        | -52.2<br>(-56.3 to -47.2)                                         | 14 728<br>(10 958 to 19 371)          | 84<br>(71 to 122)                       | -45.6<br>(-75.4 to -42.6)                                         |
| Indonesia                          | 94 050<br>(65 473 to 95 303)       | 189<br>(27 to 41)                       | -63.0<br>(-71.7 to -38.1)                                         | 11 008<br>(7 976 to 20 343)     | 5<br>(1 to 8)                           | -90.3<br>(-93.4 to -87.5)                                         | 97 057<br>(77 151 to 111 532)         | 40<br>(32 to 47)                        | -61.8<br>(-70.3 to -40.1)                                         |
| Laos                               | 7782<br>(4 794 to 10 818)          | 189<br>(99 to 149)                      | -28.2<br>(-78.6 to 35.1)                                          | 1 113<br>(917 to 1 343)         | 20<br>(14 to 26)                        | -58.1<br>(-62.3 to -54.1)                                         | 9 850<br>(6 034 to 12 321)            | 128<br>(87 to 169)                      | -47.0<br>(-76.8 to -40.8)                                         |
| Malaysia                           | 13 931<br>(11 829 to 16 206)       | 47<br>(40 to 54)                        | -46.9<br>(-55.4 to -36.6)                                         | 2 623<br>(1 728 to 3 510)       | 6<br>(6 to 12)                          | -60.3<br>(-67.8 to -51.0)                                         | 16 554<br>(12 274 to 19 096)          | 56<br>(48 to 63)                        | -49.5<br>(-56.3 to -42.6)                                         |
| Maldives                           | 166<br>(135 to 247)                | 11<br>(8 to 16)                         | -22.3<br>(-87.9 to 60.1)                                          | 36<br>(24 to 53)                | 36<br>(15 to 13)                        | -79.9<br>(-84.5 to -74.0)                                         | 202<br>(167 to 289)                   | 202<br>(41 to 65)                       | -48.2<br>(-87.2 to -6.6)                                          |
| Mauritius                          | 1 070<br>(875 to 1 377)            | 1070<br>(716 to 972)                    | -0.0<br>(-24.5 to 68.0)                                           | 166<br>(108 to 240)             | 166<br>(71 to 16)                       | -16.6<br>(-75.7 to 66.9)                                          | 1 236<br>(1 122 to 1 360)             | 11<br>(8 to 104)                        | -71.4<br>(-74.2 to -68.3)                                         |
| Myanmar                            | 1 182 to 21 096                    | 24 to 43                                | -74.7 to 10.1                                                     | 5 360 to 10 191                 | 10 to 19                                | -73.2 to -16.2                                                    | 211 424                               | 24                                      | -74.7 to 10.1                                                     |
| Philippines                        | 59 364<br>(1 732 to 68 343)        | 58<br>(41 to 83)                        | -34.7<br>(-48.1 to -23.3)                                         | 11 023<br>(7 589 to 17 791)     | 11<br>(8 to 13)                         | -38.2<br>(-44.8 to -31.2)                                         | 70 385<br>(61 948 to 80 923)          | 69<br>(61 to 77)                        | -33.3<br>(-43.1 to -23.6)                                         |
| Sri Lanka                          | 14 622<br>(11 289 to 19 231)       | 146<br>(104 to 189)                     | -23.2<br>(-43.7 to -2.6)                                          | 2 177<br>(1 392 to 2 753)       | 16<br>(16 to 16)                        | -22.3<br>(-70.0 to -55.2)                                         | 16 799<br>(14 241 to 21 544)          | 9<br>(8 to 9)                           | -40.2<br>(-46.2 to -34.2)                                         |
| Seychelles                         | 1447<br>(119 to 170)               | 147<br>(119 to 164)                     | -13.8<br>(-45.9 to 5.2)                                           | 138<br>(110 to 21)              | 138<br>(110 to 21)                      | -15.2<br>(-59.8 to -43.9)                                         | 158<br>(135 to 181)                   | 158<br>(131 to 181)                     | -13.8<br>(-46.0 to 19.0)                                          |
| Thailand                           | 29 469<br>(20 237 to 35 512)       | 49<br>(29 to 49)                        | -5.2<br>(-61.7 to 0.1)                                            | 357<br>(274 to 481)             | 357<br>(6 to 33)                        | -50.3<br>(-60.7 to -38.3)                                         | 36 226<br>(27 366 to 43 850)          | 49<br>(40 to 54)                        | -8.5<br>(-46.2 to 15.4)                                           |
| Timor-Leste                        | 1 004<br>(531 to 1 502)            | 75<br>(42 to 102)                       | -71.2<br>(-84.6 to -55.3)                                         | 184<br>(128 to 244)             | 12<br>(12 to 12)                        | -59.3<br>(-63.3 to -55.2)                                         | 1 189<br>(717 to 1 541)               | 91<br>(65 to 119)                       | -69.6<br>(-81.7 to -57.2)                                         |
| Vietnam                            | 21 213<br>(17 216 to 26 140)       | 21 213<br>(18 to 28)                    | -22.4<br>(-65.6 to -2.8)                                          | 13 021<br>(8 874 to 18 053)     | 13<br>(9 to 18)                         | -33.9<br>(-46.2 to -21.4)                                         | 34 233<br>(28 556 to 41 152)          | 22<br>(20 to 22)                        | -47.0<br>(-58.7 to -29.9)                                         |
| <b>Sub-Saharan Africa</b>          | <b>1 481 063</b>                   | <b>1481 063</b>                         | <b>-46.0</b>                                                      | <b>627 103</b>                  | <b>4</b>                                | <b>-62.7</b>                                                      | <b>2 108 222</b>                      | <b>74</b>                               | <b>-28.4</b>                                                      |
| <b>Central sub-Saharan Africa</b>  | <b>194 700</b>                     | <b>14</b>                               | <b>-46.6</b>                                                      | <b>444 725 to 619 109</b>       | <b>4</b>                                | <b>-54.9</b>                                                      | <b>1 774 010 to 2 393 778</b>         | <b>181 to 245</b>                       | <b>-46.6</b>                                                      |
| Angola                             | 43 371<br>(32 240 to 60 148)       | 144<br>(113 to 181)                     | -64.2<br>(-76.9 to -51.1)                                         | 16 002<br>(11 243 to 21 278)    | 72<br>(51 to 95)                        | -33.9<br>(-88.1 to -28.4)                                         | 30 373<br>(27 016 to 32 221)          | 72<br>(71 to 72)                        | -57.7<br>(-70.2 to -45.1)                                         |
| Central African Republic           | 10 518<br>(4 411 to 18 545)        | 10 518<br>(101 to 374)                  | -10.1<br>(-51.3 to 18.0)                                          | 213<br>(156 to 4 589)           | 0.1<br>(0 to 105)                       | -49.0<br>(-57.6 to 6.7)                                           | 14 138<br>(7 974 to 27 411)           | 80<br>(188 to 461)                      | -10.1<br>(-38.0 to 17.6)                                          |
| Congo (Brazzaville)                | 9 981<br>(8 781 to 10 581)         | 9 981<br>(8 781 to 10 581)              | -0.1<br>(-6.5 to 22.5)                                            | 92<br>(49 to 107)               | 92<br>(49 to 107)                       | -0.1<br>(-29.5 to 18.2)                                           | 9 981<br>(8 952 to 11 888)            | 92<br>(50 to 252)                       | -0.1<br>(-46.5 to -21.4)                                          |
| DRCongo                            | 1 300 983<br>(62 650 to 197 310)   | 14<br>(7 to 21)                         | -98.8<br>(-97.4 to -98.1)                                         | 76 775<br>(33 148 to 97 574)    | 56<br>(56 to 103)                       | -7.9<br>(-13.8 to -1.7)                                           | 1 824 461<br>(1 180 088 to 2 539 586) | 252<br>(155 to 286)                     | -98.8<br>(-97.4 to -98.1)                                         |
| Equatorial Guinea                  | 1 112<br>(661 to 1 718)            | 93<br>(58 to 141)                       | -72.9<br>(-84.7 to -56.6)                                         | 505<br>(384 to 676)             | 5<br>(5 to 5)                           | -40.2<br>(-59.0 to -21.4)                                         | 1 618<br>(1 400 to 2 229)             | 168<br>(130 to 189)                     | -68.4<br>(-79.0 to -47.0)                                         |
| Gabon                              | 1 525<br>(1 049 to 2 601)          | 1 525<br>(870 to 1 601)                 | -22.1<br>(-63.9 to -16.7)                                         | 1 077<br>(785 to 1 392)         | 11<br>(8 to 18)                         | -29.2<br>(-34.6 to -24.6)                                         | 2 702<br>(2 072 to 3 377)             | 68<br>(32 to 232)                       | -29.2<br>(-56.5 to -2.1)                                          |
| <b>Eastern sub-Saharan Africa</b>  | <b>528 900</b>                     | <b>129</b>                              | <b>-49.8</b>                                                      | <b>282 466</b>                  | <b>89</b>                               | <b>-44.6</b>                                                      | <b>811 266</b>                        | <b>227</b>                              | <b>-49.8</b>                                                      |
| Burundi                            | 19 009<br>(2 293 to 16 250)        | 178<br>(116 to 240)                     | -72.8<br>(-82.6 to -52.9)                                         | 208<br>(6 466 to 21 213)        | 72<br>(72 to 133)                       | -23.7<br>(-28.3 to 18.5)                                          | 28 217<br>(23 644 to 36 096)          | 280<br>(219 to 347)                     | -40.7<br>(-50.8 to -30.8)                                         |
| Comoros                            | 817<br>(584 to 1 200)              | 136<br>(93 to 176)                      | -54.8<br>(-68.8 to -28.8)                                         | 668<br>(471 to 870)             | 101<br>(110 to 113)                     | -34.8<br>(-89.0 to -30.2)                                         | 1 484<br>(1 173 to 1 940)             | 148<br>(110 to 286)                     | -47.7<br>(-58.1 to -31.7)                                         |
| Djibouti                           | 1 568<br>(860 to 2 207)            | 1 568<br>(916 to 209)                   | -11.1<br>(-69.9 to 21.5)                                          | 94<br>(67 to 124)               | 94<br>(85 to 117)                       | -9.4<br>(-39.5 to 29.8)                                           | 2 727<br>(1 640 to 3 247)             | 251<br>(163 to 301)                     | -9.4<br>(-46.5 to 27.2)                                           |
| Eritrea                            | 9 468<br>(8 849 to 12 460)         | 112<br>(83 to 212)                      | -45.2<br>(-62.9 to -2.7)                                          | 4 132<br>(3 619 to 4 739)       | 9<br>(9 to 9)                           | -45.2<br>(-70.3 to -20.2)                                         | 14 600<br>(11 738 to 18 122)          | 98<br>(27 to 338)                       | -45.2<br>(-55.2 to -12.6)                                         |
| Ethiopia                           | 1 09 554<br>(68 979 to 145 219)    | 112<br>(77 to 161)                      | -45.2<br>(-70.1 to 0.7)                                           | 75 243<br>(52 718 to 89 851)    | 23<br>(6 to 20)                         | -23.0<br>(-27.9 to 18.3)                                          | 184 795<br>(150 383 to 217 317)       | 204<br>(168 to 212)                     | -51.5<br>(-64.0 to 21.9)                                          |
| Kenya                              | 48 456<br>(37 627 to 66 497)       | 117<br>(79 to 162)                      | -40.2<br>(-60.6 to -15.1)                                         | 17 479<br>(10 885 to 27 007)    | 49<br>(39 to 76)                        | -2.2<br>(-9.3 to 5.2)                                             | 63 335<br>(51 821 to 86 913)          | 166<br>(116 to 220)                     | -31.9<br>(-43.8 to -11.0)                                         |
| Madagascar                         | 38 054<br>(27 717 to 51 194)       | 151<br>(113 to 197)                     | -66.1<br>(-80.0 to -23.1)                                         | 151<br>(15 847 to 28 993)       | 12<br>(7 to 14)                         | -66.1<br>(-81.3 to -51.0)                                         | 254<br>(180 676 to 75 602)            | 254<br>(207 to 312)                     | -66.1<br>(-80.3 to -24.6)                                         |
| Malawi                             | 1 168 to 5 051<br>(686 to 28 808)  | 152<br>(106 to 164)                     | -56.7<br>(-70.0 to 16.2)                                          | 1 390<br>(839 to 15 737)        | 83<br>(50 to 108)                       | -56.7<br>(-81.0 to 8.8)                                           | 2 318<br>(2 713 to 41 288)            | 83<br>(77 to 255)                       | -56.7<br>(-59.8 to 3.1)                                           |
| Mozambique                         | 50 663<br>(38 974 to 69 551)       | 182<br>(127 to 255)                     | -51.1<br>(-65.8 to -25.5)                                         | 20 959<br>(14 852 to 27 455)    | 80<br>(60 to 108)                       | -39.1<br>(-44.3 to 10.1)                                          | 71 627<br>(58 232 to 91 537)          | 266<br>(222 to 318)                     | -48.6<br>(-60.1 to 16.6)                                          |
| Rwanda                             | 16 575<br>(11 530 to 26 381)       | 139<br>(101 to 214)                     | -57.5<br>(-72.6 to -21.7)                                         | 4 457<br>(3 677 to 12 380)      | 89<br>(64 to 115)                       | -26.3<br>(-40.9 to 30.3)                                          | 26 032<br>(19 844 to 36 549)          | 89<br>(77 to 307)                       | -50.9<br>(-63.7 to -26.5)                                         |
| Somalia                            | 31 496<br>(20 789 to 47 413)       | 191<br>(131 to 284)                     | -60.1<br>(-84.2 to 27.8)                                          | 194<br>(10 632 to 24 445)       | 122<br>(88 to 158)                      | -7.2<br>(-13.1 to 0.7)                                            | 484 310<br>(16 716 to 65 477)         | 314<br>(242 to 411)                     | -60.1<br>(-63.1 to 10.1)                                          |
| South Sudan                        | 20 208<br>(4 950 to 40 120)        | 203<br>(153 to 365)                     | -56.2<br>(-82.1 to 31.8)                                          | 33 042<br>(6 702 to 12 310)     | 92<br>(84 to 102)                       | -46.7<br>(-10.8 to 0.0)                                           | 118 066<br>(24 608 to 49 809)         | 231<br>(263 to 484)                     | -56.2<br>(-39.4 to 17.5)                                          |
| Tanzania                           | 86 248<br>(64 446 to 129 784)      | 142<br>(104 to 191)                     | -28.8<br>(-53.1 to 0.7)                                           | 41 750<br>(29 183 to 52 264)    | 9<br>(7 to 23)                          | -9.6<br>(-15.7 to 3.3)                                            | 127 998<br>(102 211 to 167 101)       | 236<br>(186 to 288)                     | -25.8<br>(-41.2 to 11.2)                                          |
| Uganda                             | 47 248<br>(4 741 to 67 032)        | 123<br>(92 to 163)                      | -46.3<br>(-60.8 to -14.8)                                         | 27 535<br>(19 258 to 38 488)    | 214<br>(95 to 119)                      | -2.6<br>(-4.5 to 9.8)                                             | 74 783<br>(59 865 to 97 113)          | 214<br>(175 to 267)                     | -32.6<br>(-48.4 to 8.3)                                           |
| Zambia                             | 2 174<br>(1 823 to 31 566)         | 217<br>(159 to 177)                     | -23.7<br>(-67.9 to -12.3)                                         | 1 308<br>(936 to 17 547)        | 92<br>(85 to 119)                       | -23.7<br>(-71.1 to -4.5)                                          | 37 049<br>(29 975 to 46 211)          | 231<br>(195 to 278)                     | -23.7<br>(-56.9 to -11.3)                                         |
| <b>Southern sub-Saharan Africa</b> | <b>1 300 121</b>                   | <b>130</b>                              | <b>-46.4</b>                                                      | <b>653 653</b>                  | <b>67</b>                               | <b>-44.6</b>                                                      | <b>1 799 564</b>                      | <b>67</b>                               | <b>-46.4</b>                                                      |
| Botswana                           | 2 883<br>(1 867 to 4 810)          | 133<br>(89 to 181)                      | -45.3<br>(-57.5 to -21.9)                                         | 1 389<br>(729 to 2 421)         | 11<br>(45 to 84)                        | -38.6<br>(-39.7 to 16.5)                                          | 4 271<br>(2 000 to 6 568)             | 196<br>(166 to 270)                     | -47.0<br>(-52.0 to 19.0)                                          |
| Lesotho                            | 5 161<br>(3 813 to 5 531)          | 281<br>(207 to 351)                     | -4.0<br>(-44.7 to 37.9)                                           | 1 554<br>(1 110 to 2 007)       | 4<br>(6 to 10)                          | -10.7<br>(-16.8 to 4.1)                                           | 6 715<br>(5 293 to 6 139)             | 84<br>(286 to 438)                      | -3.7<br>(-37.9 to 25.0)                                           |
| Namibia                            | 2 560 to 5 051<br>(1 177 to 2 251) | 49<br>(39 to 55)                        | -56.2<br>(-84.8 to -28.7)                                         | 33 042<br>(1 139 to 2 060)      | 75<br>(51 to 98)                        | -46.7<br>(-44.8 to 32.7)                                          | 118 066<br>(9 922 to 6 763)           | 231<br>(185 to 307)                     | -56.2<br>(-53.5 to -31.2)                                         |
| South Africa                       | 63 417 to 109 873                  | 243<br>(179 to 303)                     | -20.8<br>(-42.1 to 40.5)                                          | 728<br>(274 to 44 053)          | 42<br>(42 to 80)                        | -31.1<br>(-50.5 to -42.4)                                         | 3 181<br>(84 277 to 146 118)          | 308<br>(172 to 263)                     | -21.5<br>(-48.2 to -42.1)                                         |
| Swaziland                          | 1 707 to 3 188                     | 224<br>(179 to 289)                     | -10.0<br>(-28.9 to 8.2)                                           | 10<br>(8 to 19)                 | 10<br>(10 to 16)                        | -10.0<br>(-28.9 to 8.2)                                           | 33<br>(13 872 to 51 059)              | 33<br>(20 to 37)                        | -10.0<br>(-34.0 to 14.0)                                          |
| Zimbabwe                           | 2 855 to 39 267                    | 130<br>(82 to 163)                      | -39.6<br>(-52.2 to -16.0)                                         | 219 007<br>(154 009 to 285 972) | 62<br>(44 to 80)                        | -22.9<br>(-27.4 to -17.8)                                         | 846 138<br>(626 568 to 1 058 581)     | 192<br>(151 to 239)                     | -38.9<br>(-45.0 to -34.8)                                         |
| <b>Western sub-Saharan Africa</b>  | <b>404 048 to 828 532</b>          | <b>130</b>                              | <b>-46.0</b>                                                      | <b>219 007</b>                  | <b>62</b>                               | <b>-22.9</b>                                                      | <b>846 138</b>                        | <b>192</b>                              | <b>-46.0</b>                                                      |
| Benin                              | 14 479<br>(9 462 to 21 889)        | 127<br>(82 to 189)                      | -44.7<br>(-59.7 to -21.6)                                         | 6 584<br>(4 667 to 8 676)       | 71<br>(51 to 92)                        | -21.3<br>(-27.2 to -15.7)                                         | 196<br>(15 783 to 28 334)             | 196<br>(180 to 250)                     | -38.0<br>(-49.2 to -21.4)                                         |
| Burkina Faso                       | 46 900<br>(21 775 to 64 509)       | 187<br>(142 to 245)                     | -38.0<br>(-55.9 to -20.1)                                         | 12 614<br>(8 109 to 18 282)     | 65<br>(52 to 96)                        | -22.5<br>(-28.2 to 16.6)                                          | 58 704<br>(44 368 to 75 088)          | 262<br>(216 to 312)                     | -34.2<br>(-45.2 to 21.0)                                          |
| Cameroun                           | 39 910<br>(17 488 to 41 105)       | 117<br>(79 to 156)                      | -40.1<br>(-59.0 to -21.3)                                         | 14 727<br>(10 324 to 19 199)    | 10<br>(45 to 82)                        | -23.4<br>(-28.8 to 17.8)                                          | 44 637<br>(32 046 to 57 166)          | 180<br>(130 to 224)                     | -35.1<br>(-48.5 to -16.7)                                         |
| Cape Verde                         | 238<br>(197 to 306)                | 238<br>(171 to 322)                     | -0.0<br>(-31.0 to 30.0)                                           | 238<br>(163 to 307)             | 238<br>(31 to 58)                       | -0.0<br>(-44.                                                     |                                       |                                         |                                                                   |
